# Supplementary material for: Palladium(ii)-catalyzed C–C and C–O bond formation for the synthesis of C1-benzoyl isoquinolines from isoquinoline N-oxides and nitroalkenes
Source: Royal Society of Chemistry journal article supplement (doi:10.1039/c6cc03530b), 2016-01-01

# Supporting Information

## **Palladium(II)-Catalyzed C-C and C-O Bonds Formation for the Synthesis of C<sub>1</sub>-Benzoyl Isoquinolines from Isoquinoline N- Oxides and Nitro Alkenes**

*Jiu-ling Li, Wei-ze Li, Ying-chun Wang, Qiu Ren, Heng-shan Wang\* and Ying-ming  
Pan\**

### **Table of Contents**

|                                                                                          |     |
|------------------------------------------------------------------------------------------|-----|
| <b>Experimental</b> .....                                                                | S2  |
| <b>General methods and materials</b> .....                                               | S2  |
| <b>General experimental procedure</b> .....                                              | S2  |
| <b>Control experiments</b> .....                                                         | S3  |
| <b>ESI/MS experiments</b> .....                                                          | S5  |
| <b>Spectral data of all compounds</b> .....                                              | S6  |
| <b>References</b> .....                                                                  | S14 |
| <b>Copies of <sup>1</sup>H NMR and <sup>13</sup>C NMR spectra of all compounds</b> ..... | S15 |
| <b>Copies of HRMS spectra of all compounds</b> .....                                     | S36 |

## Experimental

**General methods and materials.** Proton nuclear magnetic resonance spectra ( $^1\text{H}$  NMR) and carbon nuclear magnetic resonance spectra ( $^{13}\text{C}$  NMR) were recorded at 400 MHz and 100 MHz or 500 MHz and 125 MHz, respectively, using  $\text{CDCl}_3$  as reference standard ( $\delta$  7.26 ppm) for  $^1\text{H}$  NMR and ( $\delta$  77.04 ppm) for  $^{13}\text{C}$  NMR. HRMS (ion trap) were recorded using APCI or ESI. Melting points were uncorrected. Precoated silica gel plates GF-254 were used for analytical thin-layer chromatography. Column chromatography was performed on silica gel (300-400 mesh). Starting materials were readily prepared according to literature procedures. Unless otherwise noted, all reagents were obtained commercially and used without further purification.

### General experimental procedure

#### Procedure for synthesis of aromatic nitro olefins:

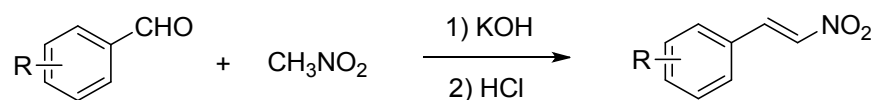

Aryl aldehyde (5 mmol), nitromethane (5 mmol) and MeOH (4 mL) were added in round-bottom flask and then stirred vigorously. 1 ml of 10.5 mol/L KOH solution was added dropwise in an ice bath, a larger number of white or yellow solid would precipitated, stirring continued for 15 min. Distilled water was added until the solution became clear, then 3mL concentrated HCl was added dropwise to the solution and yellow solid would precipitated. The yellow solid were filtered and washed with water, then evaporation under vacuum drying oven. After recrystallization from ethanol, yellow needle-like crystalloid was obtained.

#### Procedure for synthesis of isoquinoline N-Oxides:

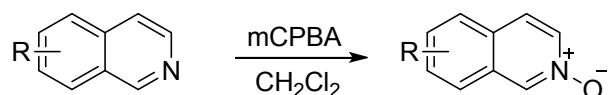

Isoquinoline substituents (2.4 mmol), mCPBA (2mmol), and DCM (15 mL) were added in round-bottom flask and stirred vigorously at room temperature. Then the mixture was monitored by TLC till the mCPBA disappeared and concentrated *in*

*vacuo*. The residue was washed with ether and filtered to give the light brown solid product.

**General procedure for the synthesis of C<sub>1</sub>- benzoyl isoquinoline 3.** A mixture of isoquinoline N-Oxides **1** (0.6 mmol, 1.2equiv), aromatic nitro alkenes **2** (0.5 mmol, 1equiv), Pd(OAc)<sub>2</sub> and 1.5mL of DMSO was added in sealing and stirred at 110 °C for 12-16 h. The progress of the reaction was monitored by thin-layer chromatography. After cooling down , water (20 mL) was added and mixture was extracted with DCM (3 × 20 mL), combined organic phases were washed with brine and dried with MgSO<sub>4</sub>.The residue was evaporated under reduced pressure and purified by flash column chromatography (petroleum ether/ethyl acetate 10:1) to give the pure product **3**.

### Control experiments

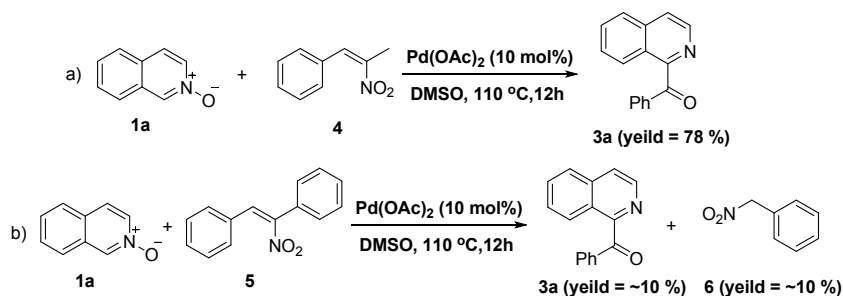

Reaction conditions: **1a** (0.6 mmol), **5** (0.5 mmol), DMSO (1.5 mL), 110 °C, 12h. Isolated. The compound **6** was determined by <sup>1</sup>H NMR and HRMS.

The <sup>1</sup>H NMR spectra of compound **3a** for the reaction **a**.

<sup>1</sup>H NMR (400 MHz, CDCl<sub>3</sub>): δ 8.61 (d, *J* = 5.6 Hz, 1H), 8.22 (dd, *J* = 8.5, 0.8 Hz, 1H), 8.00-7.90 (m, 3H), 7.81 (d, *J* = 5.3 Hz, 1H), 7.75 (ddd, *J* = 8.2, 6.9, 1.1 Hz, 1H), 7.65 -7.57 (m, 2H), 7.51-7.44 (m, 2H) ppm.

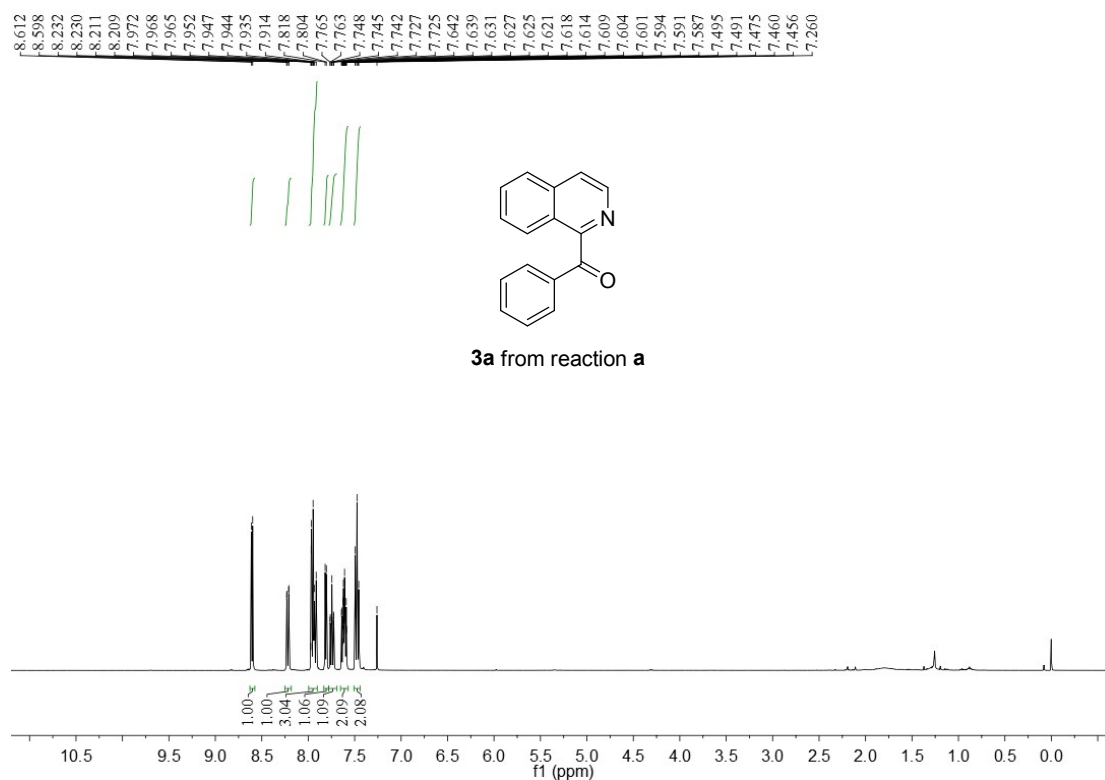

The  $^1\text{H}$  NMR spectra of compound **3a** for the reaction **b**.

$^1\text{H}$  NMR (400 MHz,  $\text{CDCl}_3$ ):  $\delta$  8.61 (d,  $J = 5.6$  Hz, 1H), 8.25- 8.18 (m, 1H), 7.95 (dt,  $J = 12.0, 4.8$  Hz, 3H), 7.82 (d,  $J = 5.5$  Hz, 1H), 7.78-7.71 (m, 1H), 7.65-7.58 (m, 2H), 7.50-7.46 (m, 2H) ppm.

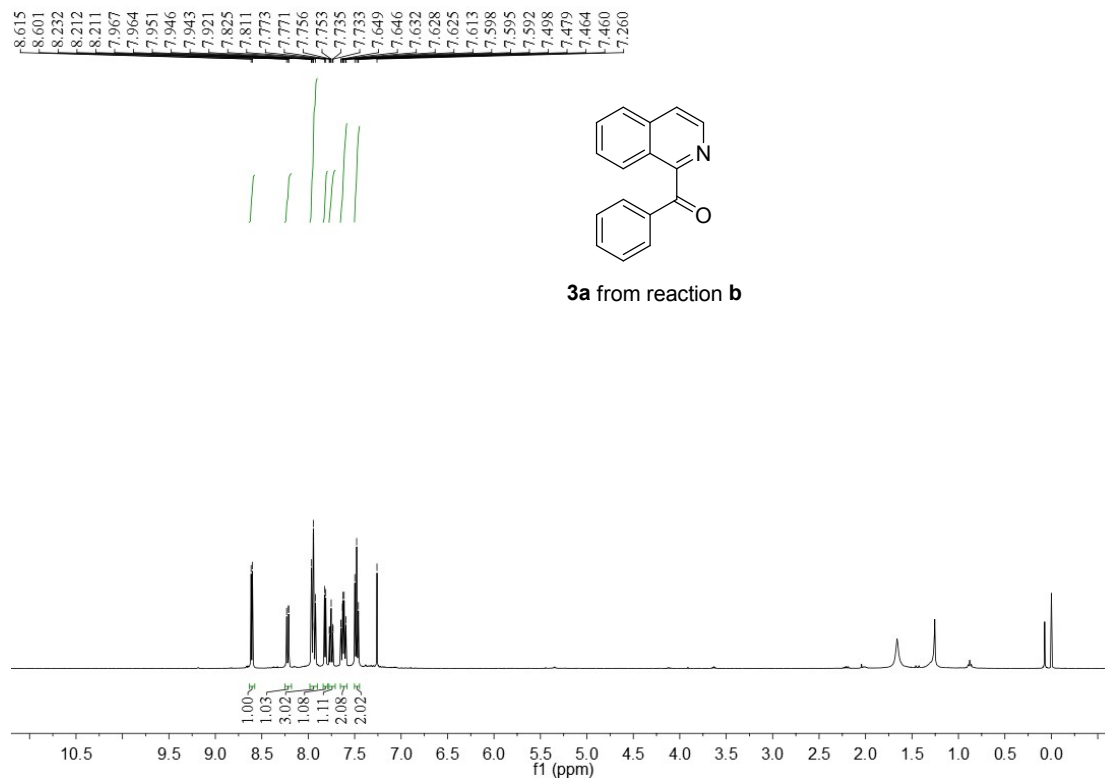

The  $^1\text{H}$  NMR spectra of compound **6** for the reaction **b**.

$^1\text{H}$  NMR (400 MHz,  $\text{CDCl}_3$ ):  $\delta$  7.49-7.38 (m, 5H), 5.44 (s, 2H) ppm; HRMS (m/z) (ESI): calcd for  $\text{C}_7\text{H}_6\text{NO}_2$  136.0399 [M-H $^+$ ]; found 136.0398.

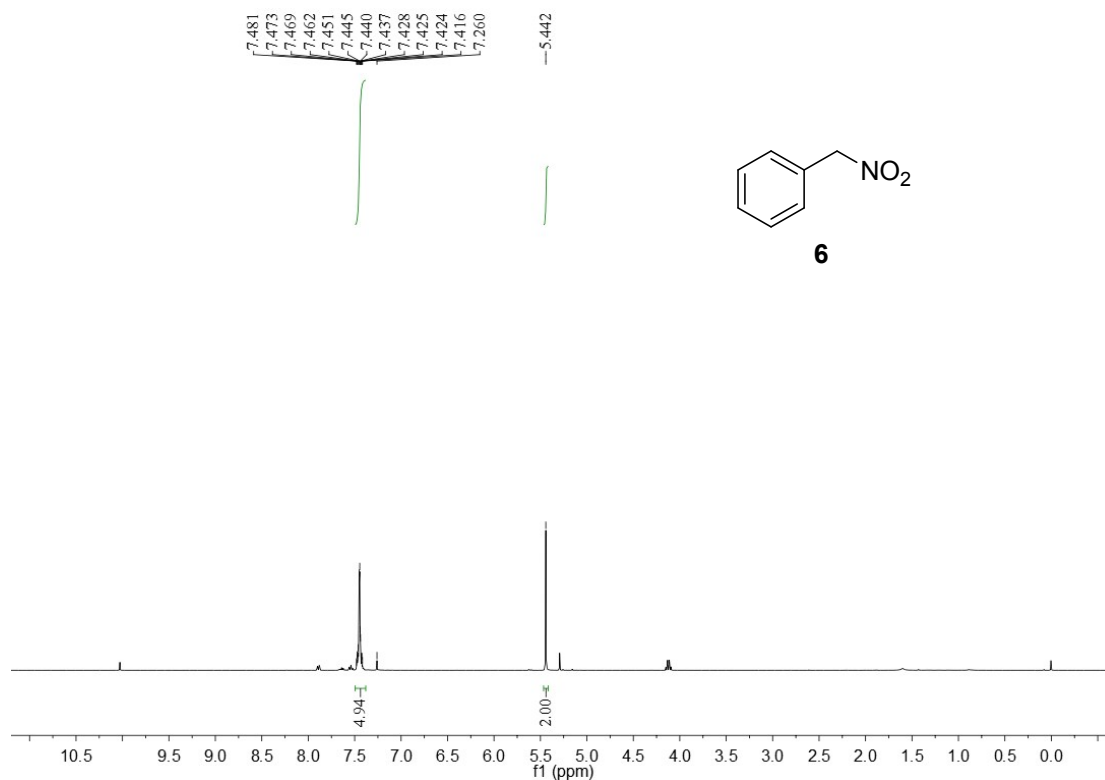

The HRMS spectra of compound **6** for the reaction **b**.

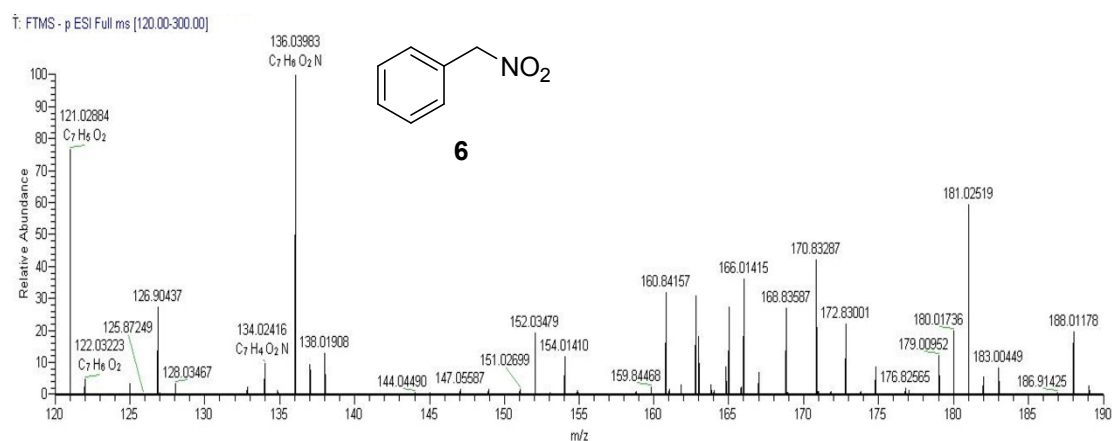

## ESI/MS experiments

A mixture of the model reaction of isoquinoline N-oxides **1a** with aryl nitro-olefin **2a** was reacted under the standard conditions for 4h and 50  $\mu\text{L}$  of the mixture was used for the ESI analysis in  $\text{CH}_3\text{OH}$ .

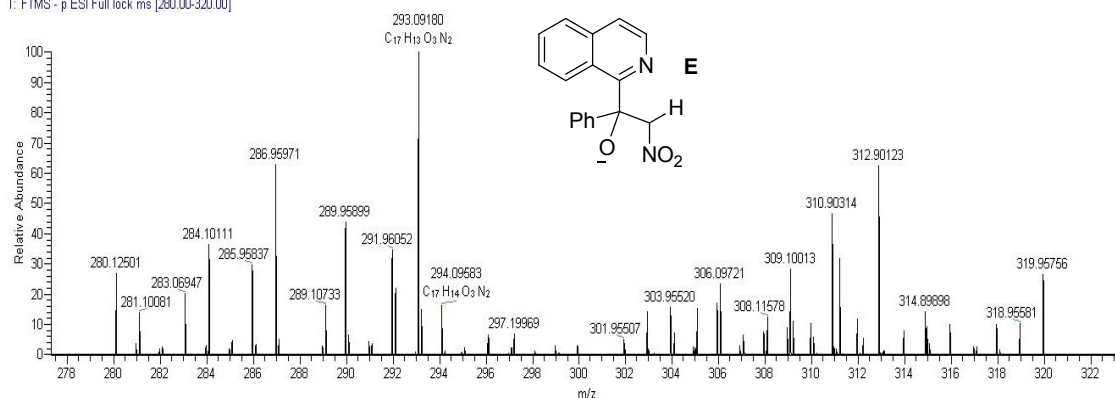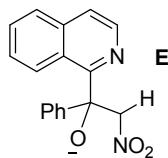

## Spectral data of all compounds

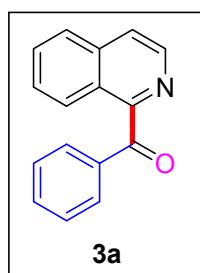

**isoquinolin-1-yl(phenyl)methanone (3a):** Derived from isoquinoline 2-oxide (**1a**) (87.1 mg, 0.6 mmol, 1.2 equiv.) and 2-nitrovinylbenzene (**2a**) (74.6 mg, 0.5 mmol, 1.0 equiv.); Brown oil (93.3 mg, 80%); <sup>1</sup>H NMR (500 MHz, CDCl<sub>3</sub>): δ 8.60 (dd, *J* = 5.6, 1.2 Hz, 1H), 8.22 (d, *J* = 8.5 Hz, 1H), 7.98-7.94 (m, 2H), 7.92 (d, *J* = 8.3 Hz, 1H), 7.80 (d, *J* = 5.6 Hz, 1H), 7.74 (dd, *J* = 8.2, 7.0 Hz, 1H), 7.64-7.58 (m, 2H), 7.47 (dd, *J* = 11.4, 4.1 Hz, 2H) ppm; <sup>13</sup>C NMR (125 MHz, CDCl<sub>3</sub>): δ 194.77, 156.48, 141.20, 136.73, 136.67, 133.69, 130.77, 130.74, 128.49, 128.34, 127.13, 126.44, 126.19, 122.61 ppm; HRMS (m/z) (ESI): calcd for C<sub>16</sub>H<sub>12</sub>NO 234.0919 [M+H<sup>+</sup>]; found 234.0911.

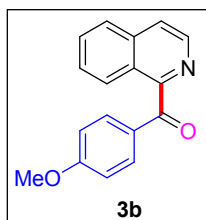

**isoquinolin-1-yl(4-methoxyphenyl)methanone (3b):** Derived from isoquinoline 2-oxide (**1a**) (87.1 mg, 0.6 mmol, 1.2 equiv.) and 1-methoxy-4-(2-nitrovinyl)benzene (**2b**) (89.6 mg, 0.5 mmol, 1.0 equiv.); Brown solid (98.7 mg, 75%), m.p. 73-75 °C, (lit.<sup>2</sup>, 74 °C); <sup>1</sup>H NMR (500 MHz, CDCl<sub>3</sub>): δ 8.59 (d, *J* = 5.6 Hz, 1H), 8.17 (dd, *J* = 8.5, 0.6 Hz, 1H), 7.96-7.92 (m, 2H), 7.91 (d, *J* = 8.3 Hz, 1H), 7.79 (d, *J* = 5.6 Hz, 1H), 7.73 (ddd, *J* = 8.2, 6.0, 1.1 Hz, 1H), 7.60 (ddd, *J* = 8.2, 6.9, 1.1 Hz, 1H), 6.97-6.92 (m, 2H), 3.87 (s, 3H) ppm; <sup>13</sup>C NMR (125 MHz, CDCl<sub>3</sub>): δ 193.39, 164.15, 157.14, 141.21, 136.68,

133.16, 130.66, 129.60, 128.13, 127.04, 126.36, 126.32, 122.23, 113.82, 55.55 ppm;  
**HRMS** (m/z) (ESI): calcd for C<sub>17</sub>H<sub>14</sub>NO<sub>2</sub> 264.1025 [M+H<sup>+</sup>]; found 264.1017.

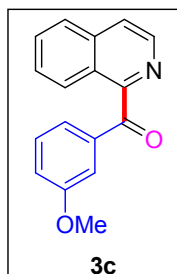

**isoquinolin-1-yl(3-methoxyphenyl)methanone (3c)**: Derived from isoquinoline 2-oxide (**1a**) (87.1 mg, 0.6 mmol, 1.2 equiv.) and 1-methoxy-3-(2-nitrovinyl)benzene (**2c**) (89.6 mg, 0.5 mmol, 1.0 equiv.); Brown solid (96.1 mg, 73%), m.p. 61-63 °C, (lit.<sup>2</sup>, 59 °C); **<sup>1</sup>H NMR** (400 MHz, CDCl<sub>3</sub>): δ 8.59 (d, *J* = 5.6 Hz, 1H), 8.19 (d, *J* = 8.5

Hz, 1H), 7.91 (d, *J* = 8.3 Hz, 1H), 7.80 (d, *J* = 5.6 Hz, 1H), 7.73 (t, *J* = 7.6 Hz, 1H), 7.60 (dd, *J* = 14.2, 6.5 Hz, 2H), 7.41 (d, *J* = 7.6 Hz, 1H), 7.34 (t, *J* = 7.9 Hz, 1H), 7.16 (dd, *J* = 8.1, 2.6 Hz, 1H), 3.85 (s, 3H) ppm; **<sup>13</sup>C NMR** (100 MHz, CDCl<sub>3</sub>): δ 194.62, 159.75, 156.55, 141.22, 137.97, 136.69, 130.74, 129.48, 128.33, 127.12, 126.39, 126.16, 123.99, 122.58, 120.46, 114.33, 55.51 ppm; **HRMS** (m/z) (ESI): calcd for C<sub>17</sub>H<sub>14</sub>NO<sub>2</sub> 264.1025 [M+H<sup>+</sup>]; found 264.1015.

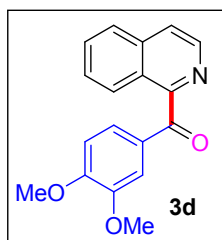

**(3,4-dimethoxyphenyl)(isoquinolin-1-yl)methanone (3d)**:

Derived from isoquinoline 2-oxide (**1a**) (87.1 mg, 0.6 mmol, 1.2 equiv.) and 1,2-dimethoxy-4-(2-nitrovinyl)benzene (**2d**) (104.6 mg, 0.5 mmol, 1.0 equiv.); Brown solid (102.6 mg, 70%), 128-130 °C; **<sup>1</sup>H NMR** (400 MHz, CDCl<sub>3</sub>): δ 8.58 (d, *J* = 5.7 Hz, 1H), 8.14 (d, *J* = 8.5 Hz, 1H), 7.90 (d, *J* = 8.3 Hz, 1H), 7.78 (d, *J* = 5.6 Hz, 1H), 7.74-7.68 (m, 2H), 7.64-7.54 (m, 1H), 7.35 (dd, *J* = 8.4, 2.0 Hz, 1H), 6.82 (d, *J* = 8.4 Hz, 1H), 3.94 (s, 3H), 3.91 (s, 3H) ppm; **<sup>13</sup>C NMR** (100 MHz, CDCl<sub>3</sub>): δ 192.45, 156.03, 153.01, 148.15, 140.13, 135.61, 129.68, 128.60, 127.13, 126.03, 125.95, 125.33, 125.24, 121.25, 110.54, 108.95, 55.11, 55.03 ppm; **HRMS** (m/z) (ESI): calcd for C<sub>18</sub>H<sub>16</sub>NO<sub>3</sub> 294.1130 [M+H<sup>+</sup>]; found 294.1115.

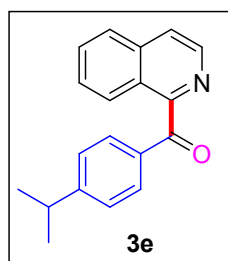

**(4-isopropylphenyl)(isoquinolin-1-yl)methanone (3e)**: Derived from isoquinoline 2-oxide (**1a**) (87.1 mg, 0.6 mmol, 1.2 equiv.) and 1-isopropyl-4-(2-nitrovinyl)benzene (**2e**) (95.6 mg, 0.5 mmol,

1.0 equiv.); Brown oil (99.1 mg, 72%);  $^1\text{H NMR}$  (400 MHz,  $\text{CDCl}_3$ ):  $\delta$  8.60 (d,  $J = 5.6$  Hz, 1H), 8.21 (d,  $J = 8.5$  Hz, 1H), 7.90 (dd,  $J = 11.9, 8.3$  Hz, 3H), 7.80 (d,  $J = 5.6$  Hz, 1H), 7.74 (t,  $J = 7.6$  Hz, 1H), 7.65-7.57 (m, 1H), 7.33 (d,  $J = 8.0$  Hz, 2H), 2.98 (dt,  $J = 13.8, 6.9$  Hz, 1H), 1.27 (d,  $J = 6.9$  Hz, 6H) ppm;  $^{13}\text{C NMR}$  (100 MHz,  $\text{CDCl}_3$ )  $\delta$  194.46, 156.85, 155.40, 141.20, 136.71, 134.47, 131.06, 130.70, 128.24, 127.07, 126.68, 126.42, 126.29, 122.43, 34.43, 23.65 ppm; **HRMS** (m/z) (ESI): calcd for  $\text{C}_{19}\text{H}_{18}\text{NO}$  276.1388 [ $\text{M}+\text{H}^+$ ]; found 276.1380.

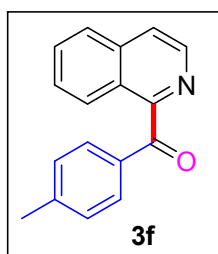

**isoquinolin-1-yl(p-tolyl)methanone (3f)**: Derived from isoquinoline 2-oxide (**1a**) (87.1 mg, 0.6 mmol, 1.2 equiv.) and 1-methyl-4-(2-nitrovinyl)benzene (**2f**) (81.6 mg, 0.5 mmol, 1.0 equiv.); Brown oil (96.4 mg, 78%);  $^1\text{H NMR}$  (500 MHz,  $\text{CDCl}_3$ ):  $\delta$  8.59 (d,  $J = 5.6$  Hz, 1H), 8.19 (d,  $J = 8.5$  Hz, 1H), 7.91 (d,  $J = 8.3$  Hz, 1H), 7.85 (d,  $J = 8.2$  Hz, 2H), 7.79 (d,  $J = 5.6$  Hz, 1H), 7.76-7.70 (m, 1H), 7.60 (ddd,  $J = 8.2, 7.0, 1.0$  Hz, 1H), 7.27 (d,  $J = 8.4$  Hz, 2H), 2.42 (s, 3H) ppm;  $^{13}\text{C NMR}$  (125 MHz,  $\text{CDCl}_3$ ):  $\delta$  194.49, 156.87, 144.72, 141.22, 136.69, 134.18, 130.88, 130.68, 129.21, 128.21, 127.07, 126.38, 126.26, 122.38, 21.79 ppm; **HRMS** (m/z) (ESI): calcd for  $\text{C}_{17}\text{H}_{14}\text{NO}$  248.1075 [ $\text{M}+\text{H}^+$ ]; found 248.1057.

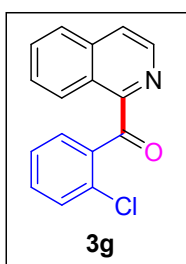

**(2-chlorophenyl)(isoquinolin-1-yl)methanone (3g)**: Derived from isoquinoline 2-oxide (**1a**) (87.1 mg, 0.6 mmol, 1.2 equiv.) and 1-chloro-2-(2-nitrovinyl)benzene (**2g**) (91.8 mg, 0.5 mmol, 1.0 equiv.); brown solid (91.0 mg, 68%), m.p. 98-100 °C, (lit.<sup>3</sup>, 100-103 °C);  $^1\text{H NMR}$  (500 MHz,  $\text{CDCl}_3$ ):  $\delta$  8.74 (d,  $J = 8.4$  Hz, 1H), 8.53 (d,  $J = 5.6$  Hz, 1H), 7.92 (d,  $J = 7.9$  Hz, 1H), 7.81 (d,  $J = 5.5$  Hz, 1H), 7.79-7.71 (m, 3H), 7.48-7.39 (m, 3H) ppm;  $^{13}\text{C NMR}$  (125 MHz,  $\text{CDCl}_3$ ):  $\delta$  196.06, 154.53, 141.33, 139.14, 136.97, 132.54, 132.23, 131.01, 130.62, 130.11, 129.01, 127.12, 126.86, 126.43, 126.38, 123.92 ppm; **HRMS** (m/z) (ESI): calcd for  $\text{C}_{16}\text{H}_{11}\text{ClNO}$  268.0529 [ $\text{M}+\text{H}^+$ ]; found 268.0520.



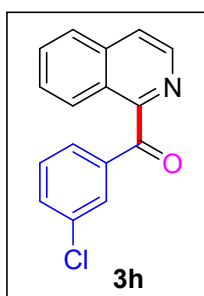

**(3-chlorophenyl)(isoquinolin-1-yl)methanone (3h)**: Derived from isoquinoline 2-oxide (**1a**) (87.1 mg, 0.6 mmol, 1.2 equiv.) and 1-chloro-3-(2-nitrovinyl)benzene (**2h**) (91.8 mg, 0.5 mmol, 1.0 equiv.); brown solid (97.7 mg, 73%), m.p. 101-103 °C, (lit.<sup>3</sup>, 104-105 °C); <sup>1</sup>H NMR (500 MHz, CDCl<sub>3</sub>): δ 8.61 (d, *J* = 5.6 Hz, 1H),

8.26 (d, *J* = 8.5 Hz, 1H), 7.97-7.92 (m, 2H), 7.84 (dd, *J* = 5.4, 3.4 Hz, 2H), 7.78-7.74 (m, 1H), 7.65 (ddd, *J* = 8.2, 6.9, 1.1 Hz, 1H), 7.57 (ddd, *J* = 8.0, 2.0, 1.0 Hz, 1H), 7.42 (t, *J* = 7.9 Hz, 1H) ppm; <sup>13</sup>C NMR (125 MHz, CDCl<sub>3</sub>): δ 193.25, 155.34, 141.12, 138.37, 136.83, 134.72, 133.46, 130.86, 130.67, 129.76, 128.95, 128.62, 127.20, 126.51, 126.03, 123.13 ppm; HRMS (m/z) (ESI): calcd for C<sub>16</sub>H<sub>11</sub>ClNO 268.0529 [M+H<sup>+</sup>]; found 268.0524.

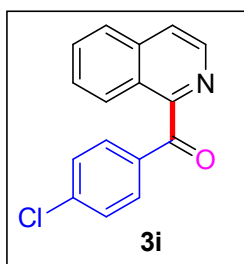

**(4-chlorophenyl)(isoquinolin-1-yl)methanone (3i)**: Derived from isoquinoline 2-oxide (**1a**) (87.1 mg, 0.6 mmol, 1.2 equiv.) and 1-chloro-4-(2-nitrovinyl)benzene (**2i**) (91.8 mg, 0.5 mmol, 1.0 equiv.); Brown solid (115.1 mg, 86%), m.p. 72-74 °C (lit.<sup>1</sup> 73-75 °C); <sup>1</sup>H NMR (400 MHz, CDCl<sub>3</sub>): δ 8.60 (d, *J* = 5.6 Hz,

1H), 8.25 (d, *J* = 8.5 Hz, 1H), 7.92 (dd, *J* = 7.8, 5.8 Hz, 3H), 7.83 (d, *J* = 5.6 Hz, 1H), 7.78-7.72 (m, 1H), 7.67-7.61 (m, 1H), 7.45 (d, *J* = 8.6 Hz, 2H) ppm; <sup>13</sup>C NMR (100 MHz, CDCl<sub>3</sub>): δ 193.41, 155.65, 141.11, 140.19, 136.81, 135.06, 132.20, 130.85, 128.81, 128.56, 127.19, 126.49, 126.09, 122.99 ppm; HRMS (m/z) (ESI): calcd for C<sub>16</sub>H<sub>11</sub>ClNO 268.0529 [M+H<sup>+</sup>]; found 268.0538.

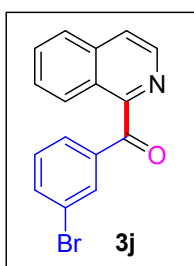

**(3-bromophenyl)(isoquinolin-1-yl)methanone (3j)**: Derived from isoquinoline 2-oxide (**1a**) (87.1 mg, 0.6 mmol, 1.2 equiv.) and 1-bromo-3-(2-nitrovinyl)benzene (**2j**) (114.0 mg, 0.5 mmol, 1.0 equiv.); brown solid (118.6 mg, 76%) m.p. 112-114 °C (lit.<sup>4</sup>, 115-116 °C); <sup>1</sup>H NMR (500 MHz, CDCl<sub>3</sub>): δ 8.60 (d, *J* = 5.6 Hz, 1H),

8.26 (d, *J* = 8.5 Hz, 1H), 8.11 (t, *J* = 1.7 Hz, 1H), 7.93 (d, *J* = 8.3 Hz, 1H), 7.88 (d, *J* =

7.9 Hz, 1H), 7.83 (d,  $J = 5.6$  Hz, 1H), 7.77-7.71 (m, 2H), 7.66-7.63 (m, 1H), 7.35 (t,  $J = 7.9$  Hz, 1H) ppm;  $^{13}\text{C}$  NMR (125 MHz,  $\text{CDCl}_3$ ):  $\delta$  193.15, 155.28, 141.12, 138.60, 136.83, 136.35, 133.56, 130.86, 130.00, 129.41, 128.63, 127.21, 126.51, 126.03, 123.15, 122.72 ppm; HRMS (m/z) (ESI): calcd for  $\text{C}_{16}\text{H}_{11}\text{BrNO}$  312.0024,314.0004 [ $\text{M}+\text{H}^+$ ]; found 312.0013,313.9992.

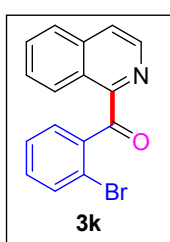

**(2-bromophenyl)(isoquinolin-1-yl)methanone (3k)**: Derived from isoquinoline 2-oxide (**1a**) (87.1 mg, 0.6 mmol, 1.2 equiv.) and 1-bromo-2-(2-nitrovinyl)benzene (**2k**) (114.0 mg, 0.5 mmol, 1.0 equiv.); brown solid (101.4 mg, 65%), m.p. 112-114 °C (lit.<sup>4</sup>, 115-116 °C);  $^1\text{H}$  NMR (400 MHz,  $\text{CDCl}_3$ ):  $\delta$  8.83-8.74 (m, 1H), 8.53 (d,  $J = 5.6$  Hz,

1H), 7.92 (dd,  $J = 7.2, 2.0$  Hz, 1H), 7.82 (d,  $J = 5.9$  Hz, 1H), 7.80-7.72 (m, 2H), 7.67 (dd,  $J = 7.6, 1.7$  Hz, 1H), 7.60 (dd,  $J = 8.0, 1.0$  Hz, 1H), 7.47 (td,  $J = 7.5, 1.1$  Hz, 1H), 7.38 (td,  $J = 7.7, 1.8$  Hz, 1H) ppm;  $^{13}\text{C}$  NMR (100 MHz,  $\text{CDCl}_3$ ):  $\delta$  196.77, 154.00, 141.34, 141.26, 136.97, 133.21, 132.15, 131.05, 130.65, 129.10, 127.40, 127.15, 126.79, 126.49, 124.06, 120.68 ppm; HRMS (m/z) (ESI): calcd for  $\text{C}_{16}\text{H}_{11}\text{BrNO}$  312.0024,314.0004 [ $\text{M}+\text{H}^+$ ]; found 312.0036,314.0015.

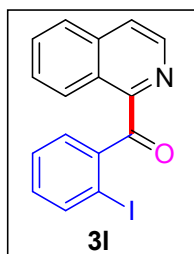

**(2-iodophenyl)(isoquinolin-1-yl)methanone (3l)**: Derived from isoquinoline 2-oxide (**1a**) (87.1 mg, 0.6 mmol, 1.2 equiv.) and 1-iodo-2-(2-nitrovinyl)benzene (**2l**) (137.5 mg, 0.5 mmol, 1.0 equiv.); Yellow solid (111.3 mg, 62%), m.p. 98-100 °C;  $^1\text{H}$  NMR (400 MHz,  $\text{CDCl}_3$ ):  $\delta$  8.86-8.79 (m, 1H), 8.54 (d,  $J = 5.6$  Hz, 1H), 7.95-

7.88 (m, 2H), 7.83 (d,  $J = 5.5$  Hz, 1H), 7.80-7.72 (m, 2H), 7.57 (dd,  $J = 7.6, 1.7$  Hz, 1H), 7.49 (td,  $J = 7.5, 1.0$  Hz, 1H), 7.20 (td,  $J = 7.7, 1.7$  Hz, 1H) ppm;  $^{13}\text{C}$  NMR (100 MHz,  $\text{CDCl}_3$ ):  $\delta$  197.71, 153.23, 144.57, 141.38, 139.87, 136.95, 132.01, 130.89, 130.67, 129.14, 127.98, 127.46, 127.18, 126.60, 124.16, 93.19 ppm; HRMS (m/z)

(ESI): calcd for C<sub>16</sub>H<sub>11</sub>INO 359.9885 [M+H<sup>+</sup>]; found 359.9873.

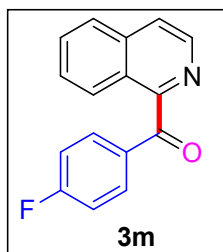

**(4-fluorophenyl)(isoquinolin-1-yl)methanone (3m):** Derived from isoquinoline 2-oxide (**1a**) (87.1 mg, 0.6 mmol, 1.2 equiv.) and 1-fluoro-4-(2-nitrovinyl)benzene (**2m**) (83.6 mg, 0.5 mmol, 1.0 equiv.); Brown solid (104.3 mg, 83%), m.p. 94-95 °C, (lit.<sup>2</sup>, 92 °C); <sup>1</sup>H NMR (500 MHz, CDCl<sub>3</sub>): δ 8.59 (d, *J* = 5.6 Hz, 1H), 8.23 (dd, *J* = 8.5, 0.5 Hz, 1H), 8.05-7.97 (m, 2H), 7.92 (d, *J* = 8.3 Hz, 1H), 7.81 (d, *J* = 5.6 Hz, 1H), 7.77-7.72 (m, 1H), 7.65-7.60 (m, 1H), 7.18-7.10 (m, 2H) ppm; <sup>13</sup>C NMR (125 MHz, CDCl<sub>3</sub>): δ 193.06, 166.14(d, <sup>1</sup>*J*<sub>CF</sub> = 254.5 Hz), 156.00, 141.09, 136.79, 133.54(d, <sup>3</sup>*J*<sub>CF</sub> = 9.5 Hz), 133.05(d, <sup>4</sup>*J*<sub>CF</sub> = 2.9 Hz), 130.82, 128.46, 127.16, 126.44, 126.11, 122.82, 115.67(d, <sup>2</sup>*J*<sub>CF</sub> = 22.0 Hz) ppm; HRMS (m/z) (ESI): calcd for C<sub>16</sub>H<sub>11</sub>FNO 252.0825 [M+H<sup>+</sup>]; found 252.0814.

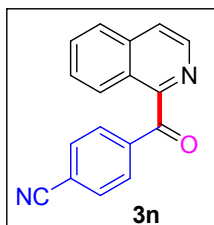

**4-(isoquinoline-1-carbonyl)benzotrile (3n):** Derived from isoquinoline 2-oxide (**1a**) (87.1 mg, 0.6 mmol, 1.2 equiv.) and 4-(2-nitrovinyl)benzotrile (**2n**) (87.1 mg, 0.5 mmol, 1.0 equiv.); Yellow solid (103.3 mg, 80%), m.p. 138-140 °C; <sup>1</sup>H NMR (400 MHz, CDCl<sub>3</sub>): δ 8.61 (d, *J* = 5.6 Hz, 1H), 8.38 (d, *J* = 8.5 Hz, 1H), 8.07 (d, *J* = 8.2 Hz, 2H), 7.96 (d, *J* = 8.3 Hz, 1H), 7.87 (d, *J* = 5.6 Hz, 1H), 7.79 (t, *J* = 7.6 Hz, 3H), 7.73-7.65 (m, 1H) ppm; <sup>13</sup>C NMR (100MHz, CDCl<sub>3</sub>): δ 192.98, 154.24, 141.02, 140.29, 136.96, 132.12, 131.15, 130.99, 128.97, 127.29, 126.72, 125.96, 123.73, 118.07, 116.40 ppm; HRMS (m/z) (ESI): calcd for C<sub>17</sub>H<sub>11</sub>N<sub>2</sub>O 259.0871 [M+H<sup>+</sup>]; found 259.0863.

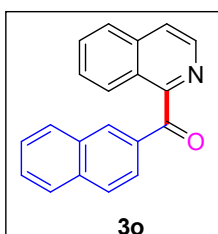

**isoquinolin-1-yl(naphthalen-2-yl)methanone (3o):** Derived from isoquinoline 2-oxide (**1a**) (87.1 mg, 0.6 mmol, 1.2 equiv.) and 2-(2-nitrovinyl)naphthalene (**2o**) (99.6 mg, 0.5 mmol, 1.0 equiv.); Brown solid (106.2 mg, 75%), m.p. 108-110 °C; <sup>1</sup>H NMR (400

MHz, CDCl<sub>3</sub>):  $\delta$  8.65 (d,  $J$  = 5.6 Hz, 1H), 8.35 (s, 1H), 8.25 (dd,  $J$  = 8.5, 0.8 Hz, 1H), 8.15 (dd,  $J$  = 8.6, 1.7 Hz, 1H), 7.95 (d,  $J$  = 8.5 Hz, 2H), 7.90-7.83 (m, 3H), 7.76 (ddd,  $J$  = 8.2, 6.9, 1.1 Hz, 1H), 7.65-7.58 (m, 2H), 7.50 (ddd,  $J$  = 8.1, 7.0, 1.1 Hz, 1H) ppm; **<sup>13</sup>C NMR** (100 MHz, CDCl<sub>3</sub>):  $\delta$  194.81, 156.74, 141.28, 136.78, 135.95, 134.01, 133.76, 132.39, 130.81, 129.89, 128.89, 128.49, 128.39, 127.83, 127.17, 126.75, 126.53, 126.27, 125.29, 122.64 ppm; **HRMS** (m/z) (ESI): calcd for C<sub>20</sub>H<sub>14</sub>NO 284.1075 [M+H<sup>+</sup>]; found 284.1063.

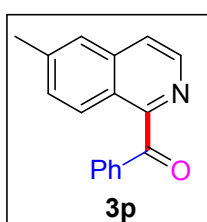

**(6-methylisoquinolin-1-yl)(phenyl)methanone (3p)**: Derived from 6-methylisoquinoline 2-oxide (**1b**) (95.5 mg, 0.6 mmol, 1.2 equiv.) and 2-nitrovinylbenzene (**2a**) (74.6 mg, 0.5 mmol, 1.0 equiv.); Brown oil (98.9 mg, 80%); **<sup>1</sup>H NMR** (400 MHz, CDCl<sub>3</sub>):  $\delta$

8.56 (d,  $J$  = 5.6 Hz, 1H), 8.11 (d,  $J$  = 8.7 Hz, 1H), 7.95 (d,  $J$  = 7.3 Hz, 2H), 7.72 (d,  $J$  = 5.6 Hz, 1H), 7.69 (s, 1H), 7.60 (t,  $J$  = 7.4 Hz, 1H), 7.50-7.42 (m, 3H), 2.56 (s, 3H) ppm; **<sup>13</sup>C NMR** (100 MHz, CDCl<sub>3</sub>):  $\delta$  194.85, 156.08, 141.32, 141.18, 137.12, 136.72, 133.64, 130.76, 130.69, 128.47, 125.99, 125.95, 124.89, 122.15, 22.02 ppm; **HRMS** (m/z) (ESI): calcd for C<sub>17</sub>H<sub>14</sub>NO 248.1075 [M+H<sup>+</sup>]; found 248.1067.

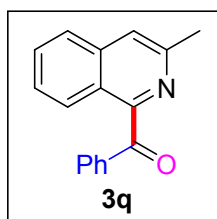

**(3-methylisoquinolin-1-yl)(phenyl)methanone (3q)**: Derived from 3-methylisoquinoline 2-oxide (**1c**) (95.5 mg, 0.6 mmol, 1.2 equiv.) and 2-nitrovinylbenzene (**2a**) (74.6 mg, 0.5 mmol, 1.0 equiv.); Brown solid (106.3 mg, 86%), m.p. 96-98 °C, (lit.<sup>1</sup> 95-97

°C); **<sup>1</sup>H NMR** (400 MHz, CDCl<sub>3</sub>):  $\delta$  8.06 (d,  $J$  = 8.5 Hz, 1H), 7.96 (d,  $J$  = 7.9 Hz, 2H), 7.80 (d,  $J$  = 8.3 Hz, 1H), 7.66 (t,  $J$  = 7.6 Hz, 1H), 7.62-7.56 (m, 2H), 7.47 (dt,  $J$  = 15.3, 7.8 Hz, 3H), 2.73 (s, 3H) ppm; **<sup>13</sup>C NMR** (100 MHz, CDCl<sub>3</sub>):  $\delta$  194.95, 156.33, 150.31, 137.39, 136.52, 133.71, 130.86, 130.60, 128.45, 127.21, 126.52, 125.99, 124.44, 120.46, 24.14 ppm; **HRMS** (m/z) (ESI): calcd for C<sub>17</sub>H<sub>14</sub>NO 248.1075 [M+H<sup>+</sup>]; found 248.1063.

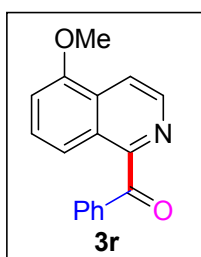

**(5-methoxyisoquinolin-1-yl)(phenyl)methanone (3r)**: Derived

from 5-methoxyisoquinoline 2-oxide (**1d**) (105.1 mg, 0.6 mmol, 1.2 equiv.) and 2-nitrovinylbenzene (**2a**) (74.6 mg, 0.5 mmol, 1.0 equiv.); Yellow solid (102.7 mg, 78%), m.p. 118-120 °C; <sup>1</sup>H NMR (400 MHz, CDCl<sub>3</sub>): δ 8.60 (d, *J* = 5.7 Hz, 1H), 8.20 (d, *J* = 5.7 Hz, 1H), 7.93 (d, *J* = 8.0 Hz, 2H), 7.73 (d, *J* = 8.5 Hz, 1H), 7.60 (t, *J* = 7.2 Hz, 1H), 7.49 (dt, *J* = 15.8, 7.9 Hz, 3H), 7.04 (d, *J* = 7.7 Hz, 1H), 4.05 (s, 3H) ppm; <sup>13</sup>C NMR (100 MHz, CDCl<sub>3</sub>): δ 194.95, 155.87, 154.71, 140.89, 136.69, 133.63, 130.73, 129.53, 128.47, 128.43, 127.08, 117.78, 117.04, 107.79, 55.79 ppm; HRMS (m/z) (ESI): calcd for C<sub>17</sub>H<sub>14</sub>NO<sub>2</sub> 264.1025 [M+H<sup>+</sup>]; found 264.1017.

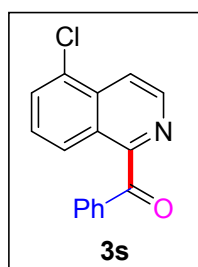

**(5-chloroisoquinolin-1-yl)(phenyl)methanone (3s)**: Derived from 5-chloroisoquinoline 2-oxide (**1e**) (107.8 mg, 0.6 mmol, 1.2 equiv.) and 2-nitrovinylbenzene (**2a**) (74.6 mg, 0.5 mmol, 1.0 equiv.); Brown solid (104.4 mg, 78%), m.p. 125-127 °C; <sup>1</sup>H NMR (400 MHz, CDCl<sub>3</sub>): δ 8.71 (d, *J* = 5.9 Hz, 1H), 8.21 (dd, *J* = 5.9, 0.9 Hz, 1H), 8.16-8.10 (m, 1H), 7.96-7.90 (m, 2H), 7.82 (dd, *J* = 7.5, 0.9 Hz, 1H), 7.65-7.59 (m, 1H), 7.53 (dd, *J* = 8.5, 7.6 Hz, 1H), 7.50-7.45 (m, 2H) ppm; <sup>13</sup>C NMR (100 MHz, CDCl<sub>3</sub>): δ 194.36, 156.78, 142.35, 136.36, 134.58, 133.93, 131.59, 130.76, 130.70, 128.58, 128.17, 127.30, 125.25, 118.90 ppm; HRMS (m/z) (APCI): calcd for C<sub>16</sub>H<sub>11</sub>ClNO 268.0529 [M+H<sup>+</sup>]; found 268.0510.

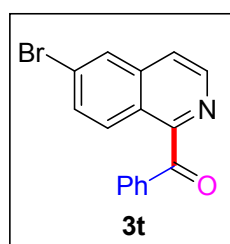

**(6-bromoisoquinolin-1-yl)(phenyl)methanone (3t)**: Derived from 6-bromoisoquinoline 2-oxide (**1f**) (134.4 mg, 0.6 mmol, 1.2 equiv.) and 2-nitrovinylbenzene (**2a**) (74.6 mg, 0.5 mmol, 1.0 equiv.); White solid (109.3 mg, 70%), m.p. 116-118 °C; <sup>1</sup>H NMR (500 MHz, CDCl<sub>3</sub>): δ 8.62 (d, *J* = 5.6 Hz, 1H), 8.11 (dd, *J* = 8.1, 5.4 Hz, 2H), 7.96-7.91 (m, 2H), 7.74-7.67 (m, 2H), 7.64-7.59 (m, 1H), 7.48 (t, *J* = 7.8 Hz, 2H) ppm; <sup>13</sup>C NMR (125 MHz, CDCl<sub>3</sub>): δ 194.22, 156.49, 142.21, 137.82, 136.43, 133.82, 131.95, 130.78, 129.25, 128.52, 127.99, 125.72, 124.90, 121.52 ppm; HRMS (m/z) (ESI): calcd for C<sub>16</sub>H<sub>11</sub>BrNO 312.0024, 314.0004 [M+H<sup>+</sup>]; found 312.0014, 313.9992.

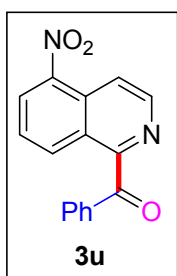

**(5-nitroisoquinolin-1-yl)(phenyl)methanone (3u)**: Derived from 5-nitroisoquinoline 2-oxide (**1g**) (114.1 mg, 0.6 mmol, 1.2 equiv.) and 2-nitrovinylbenzene (**2a**) (74.6 mg, 0.5 mmol, 1.0 equiv.); Light yellow solid (105.8 mg, 76%), m.p. 110-112 °C, (lit.<sup>1</sup>, 106-108 °C); <sup>1</sup>H NMR (400 MHz, CDCl<sub>3</sub>): δ 8.83 (d, *J* = 6.1 Hz, 1H), 8.63 (d, *J* =

6.1 Hz, 1H), 8.56 (t, *J* = 7.3 Hz, 2H), 7.94 (d, *J* = 7.8 Hz, 2H), 7.74 (t, *J* = 8.1 Hz, 1H), 7.65 (t, *J* = 7.4 Hz, 1H), 7.51 (t, *J* = 7.6 Hz, 2H) ppm; <sup>13</sup>C NMR (100 MHz, CDCl<sub>3</sub>): δ 193.80, 157.17, 145.27, 144.45, 136.02, 134.25, 133.24, 130.84, 129.15, 128.69, 128.60, 126.77, 126.75, 117.62 ppm; HRMS (m/z) (ESI): calcd for C<sub>16</sub>H<sub>11</sub>N<sub>2</sub>O<sub>3</sub> 279.0770 [M+H<sup>+</sup>]; found 279.0756.

## Reference

1. W. Ali, A. Behera, S. Guin, B. K. Patel, *J. Org. Chem.* **2015**, *80*, 5625–5632.
2. B. Reux, T. Nevalainen, K. H. Raitio, A. M. P. Koskinen, *Bio. Med. Chem.* **2009**, *17*, 4441-4447.
3. D. P. Aysola, M. S. Gibson, *Can. J. Chem.* **1977**, *55*, 435-437.
4. H. W. Gibson, F. D. Popp, *J. Chem. Soc. C* **1966**, 1860-1864.

**Copies of <sup>1</sup>H NMR and <sup>13</sup>C NMR Spectra of all compounds**

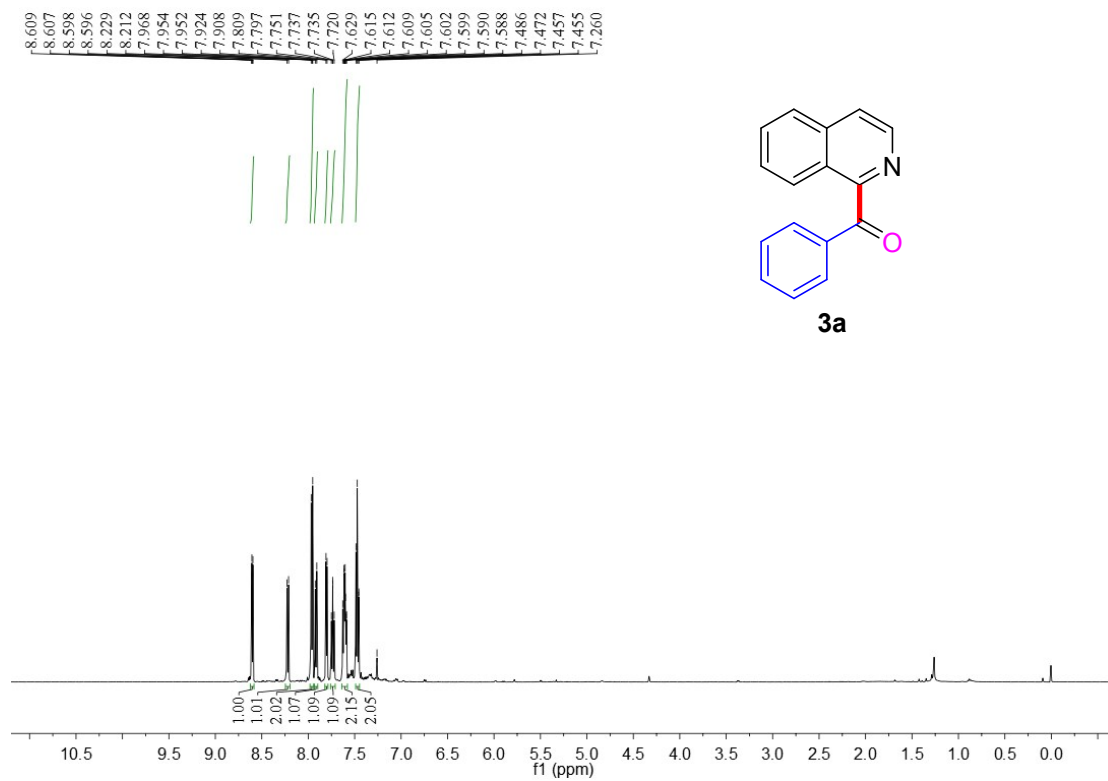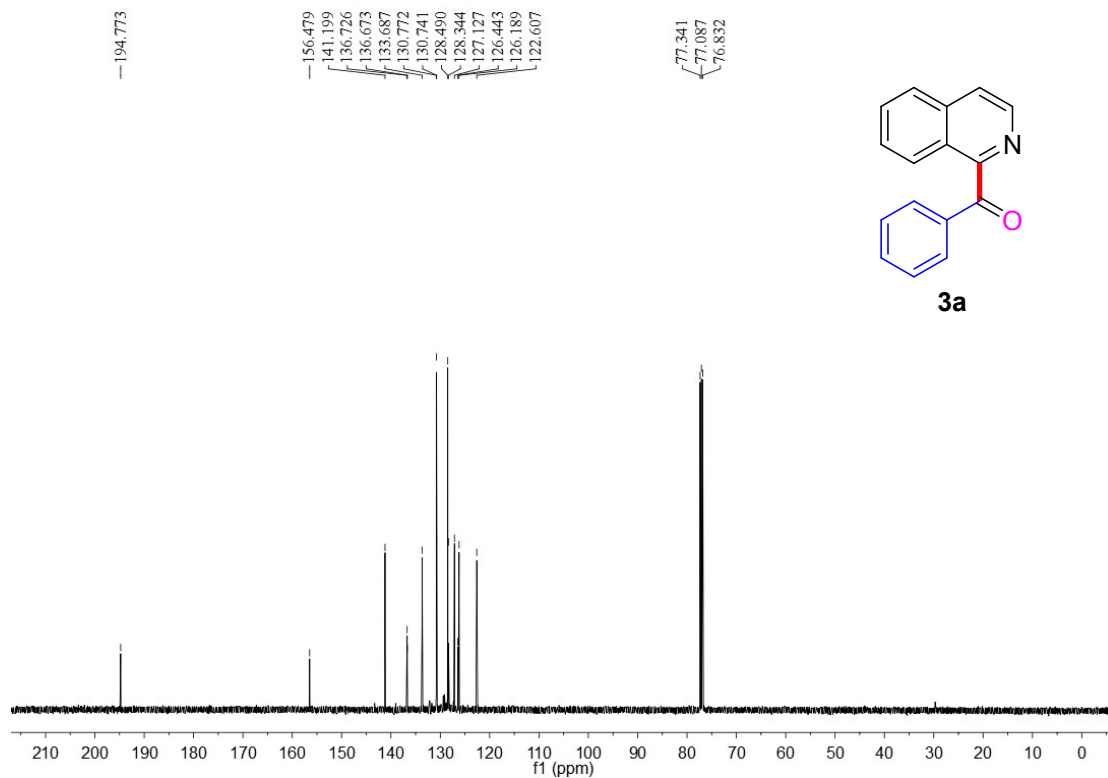

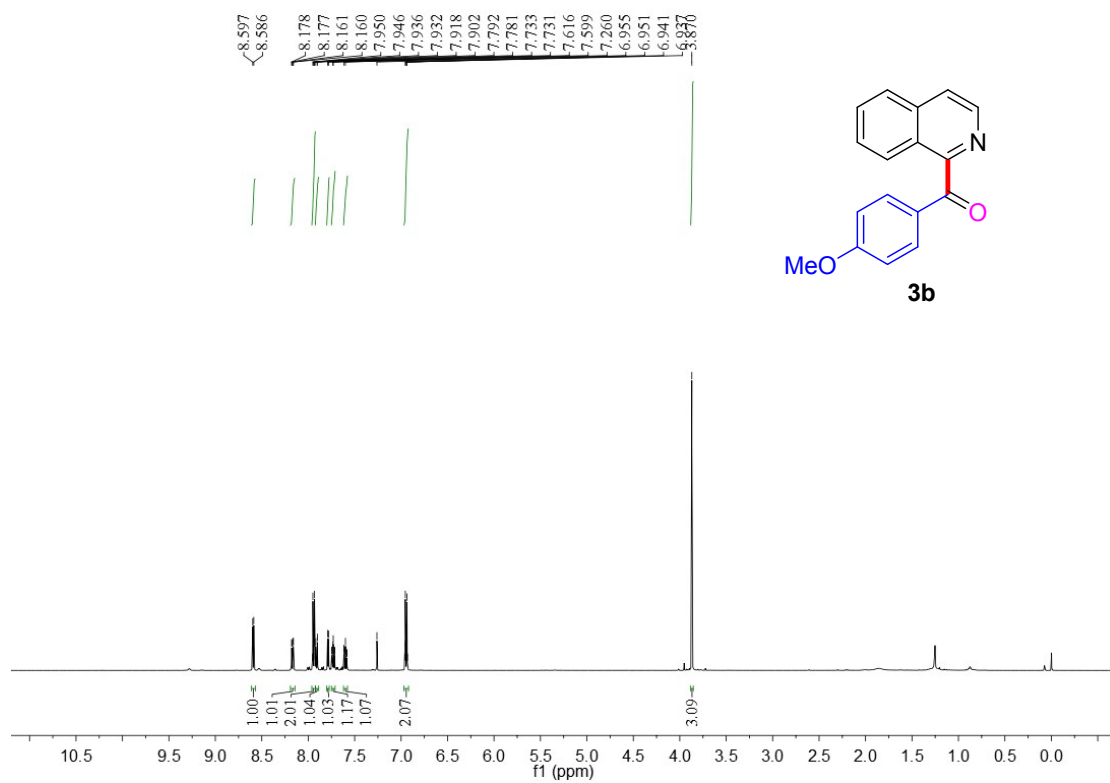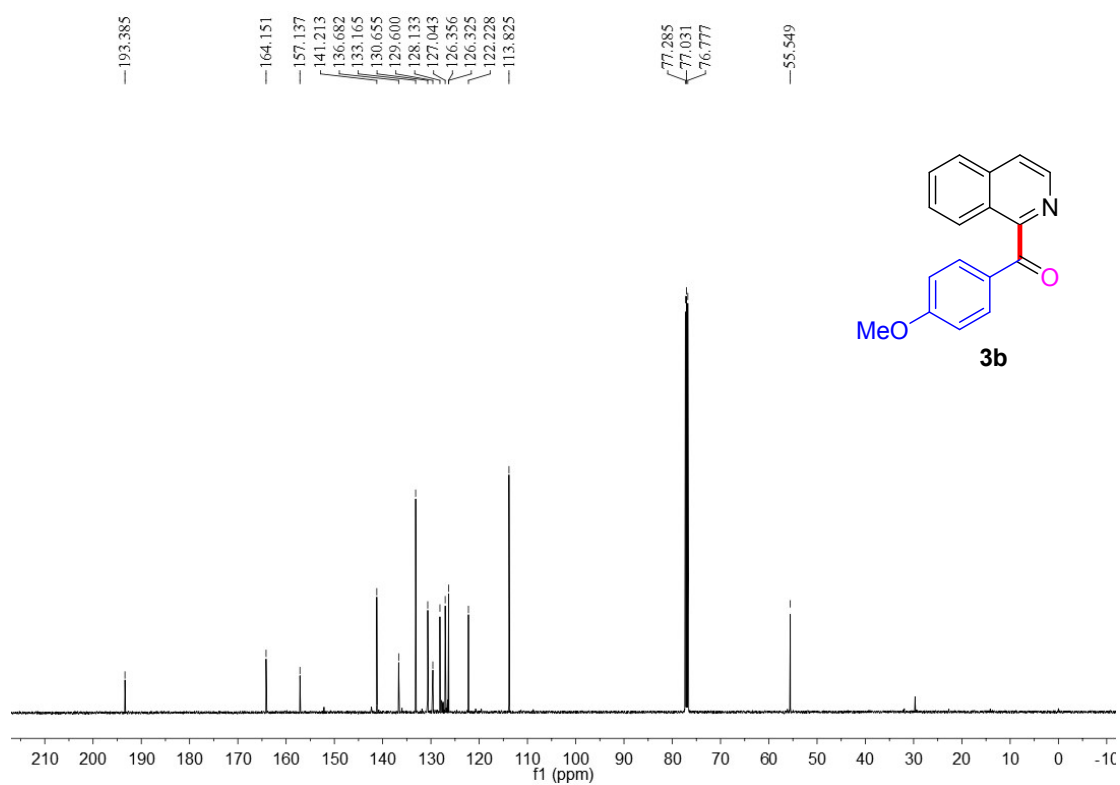



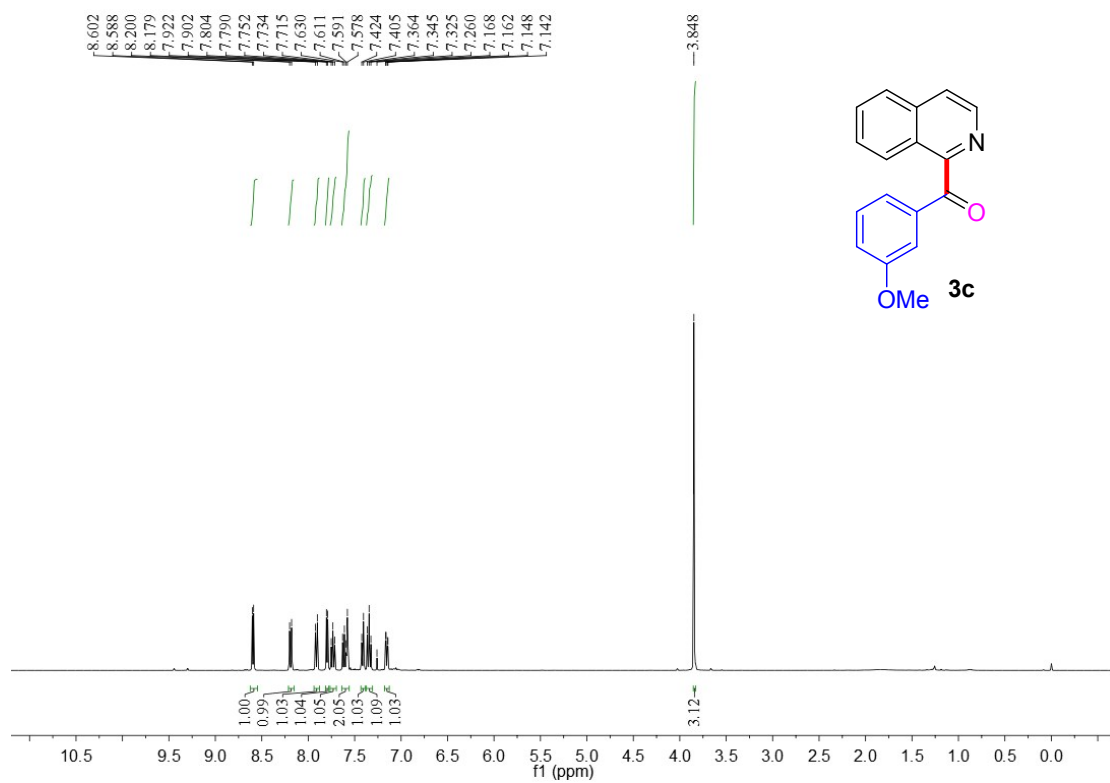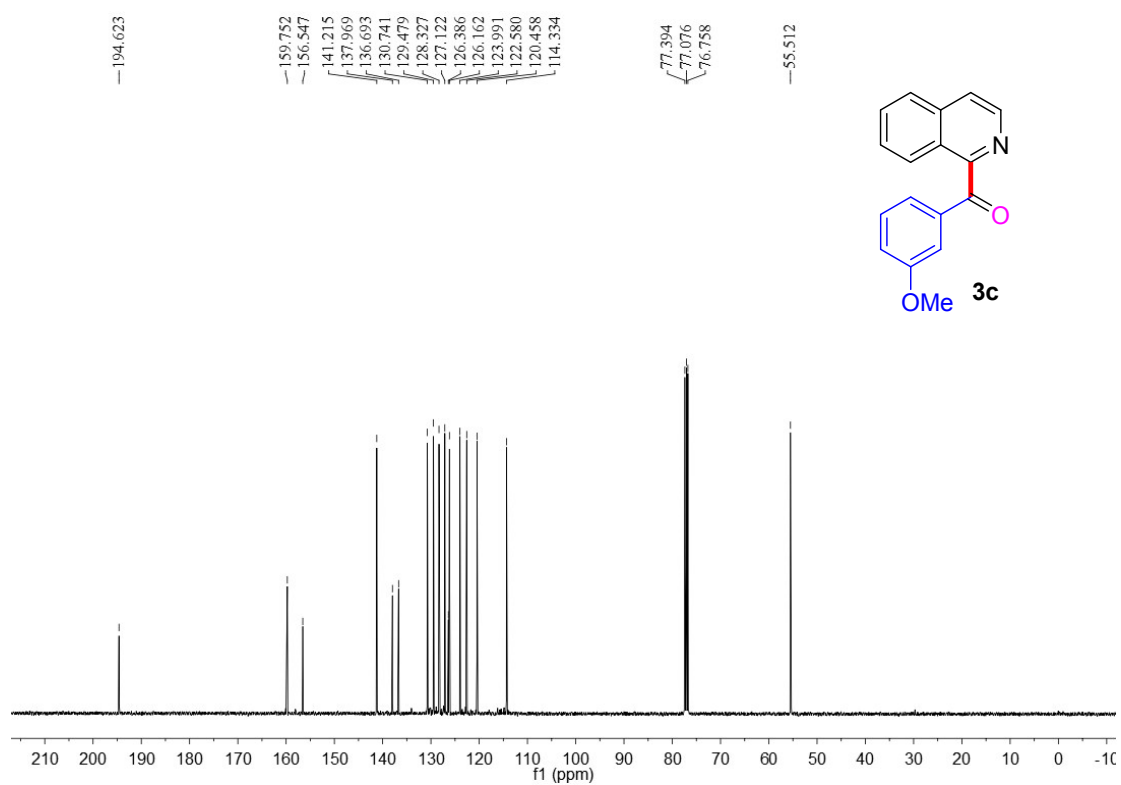

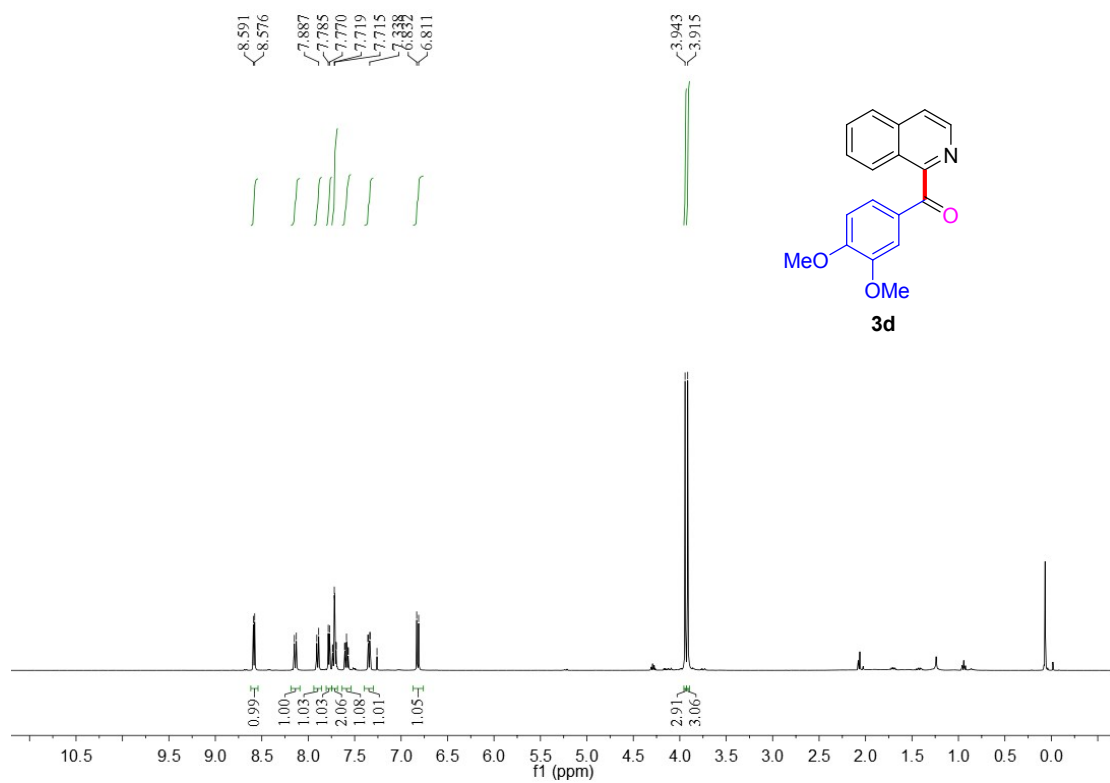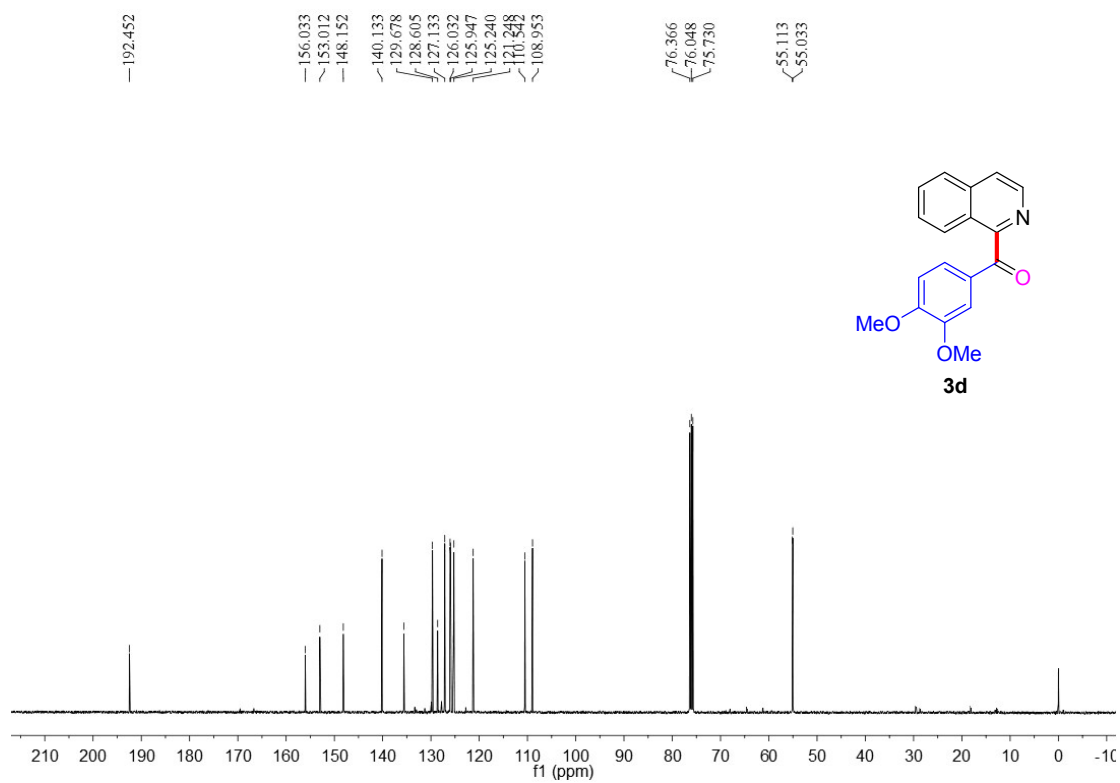

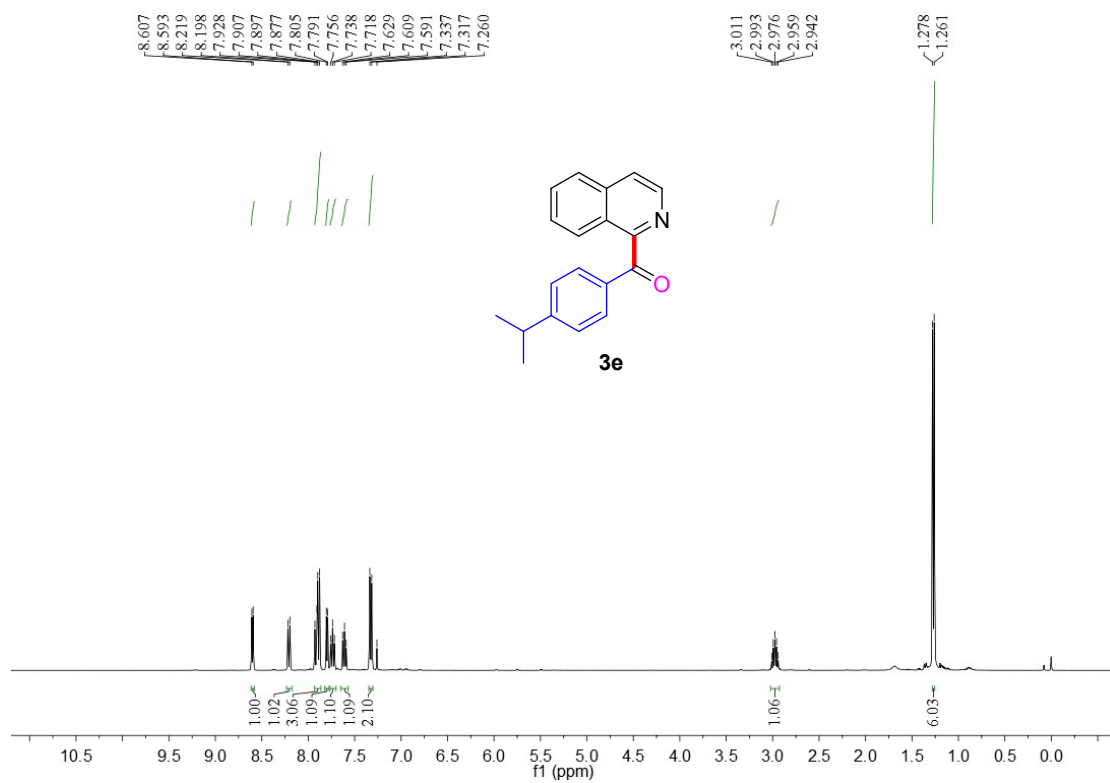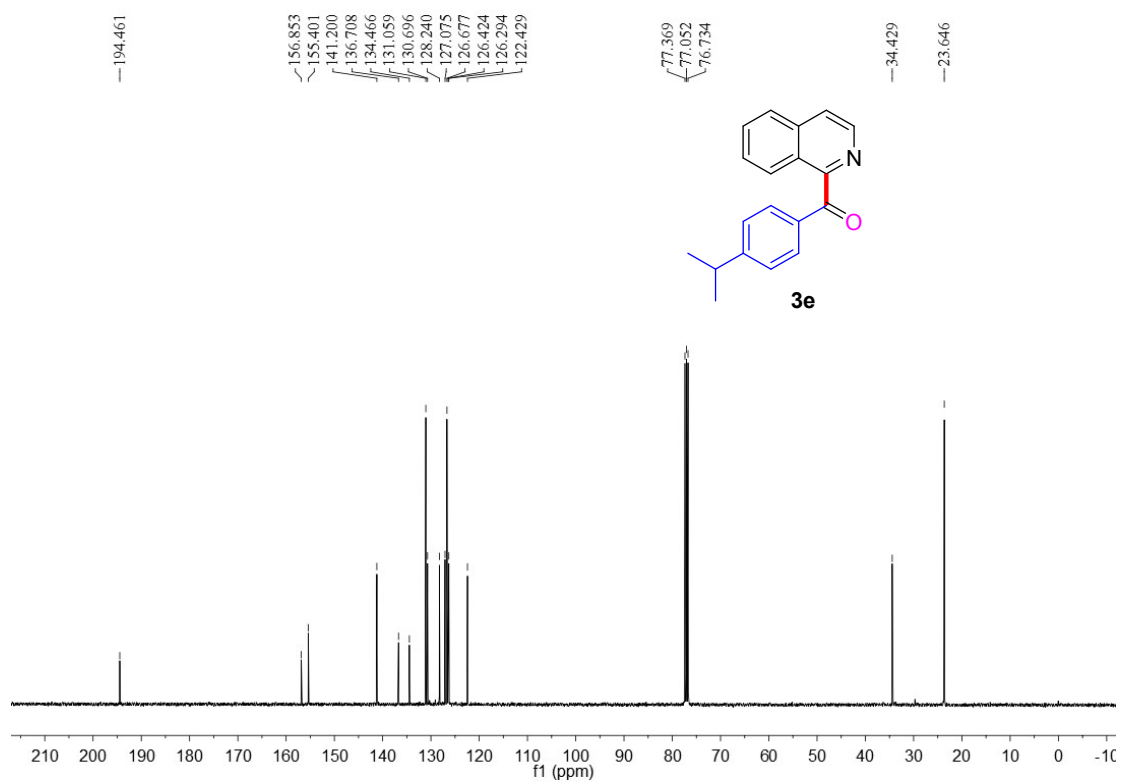

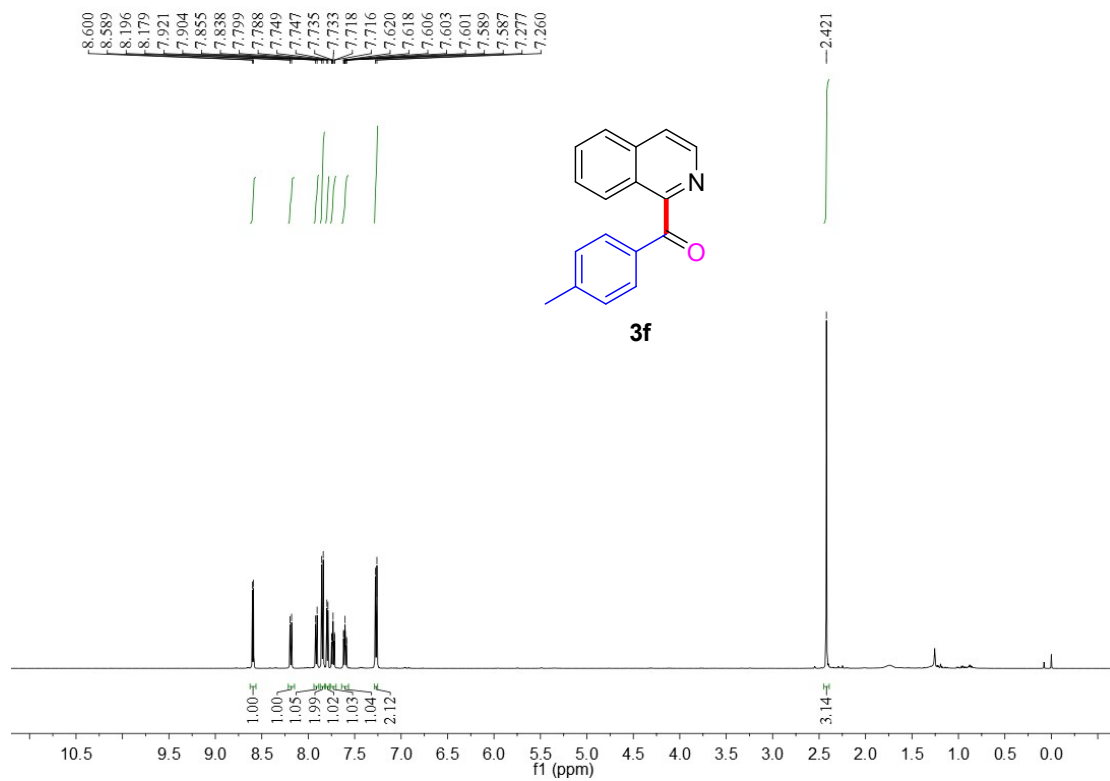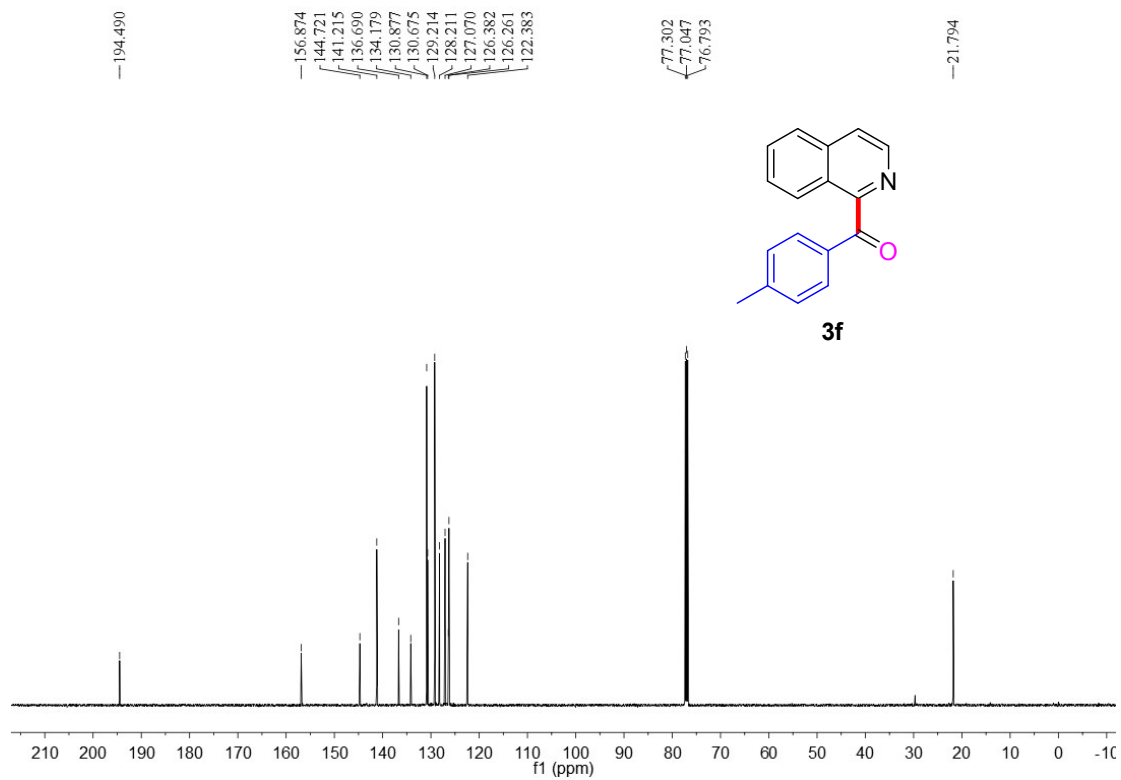

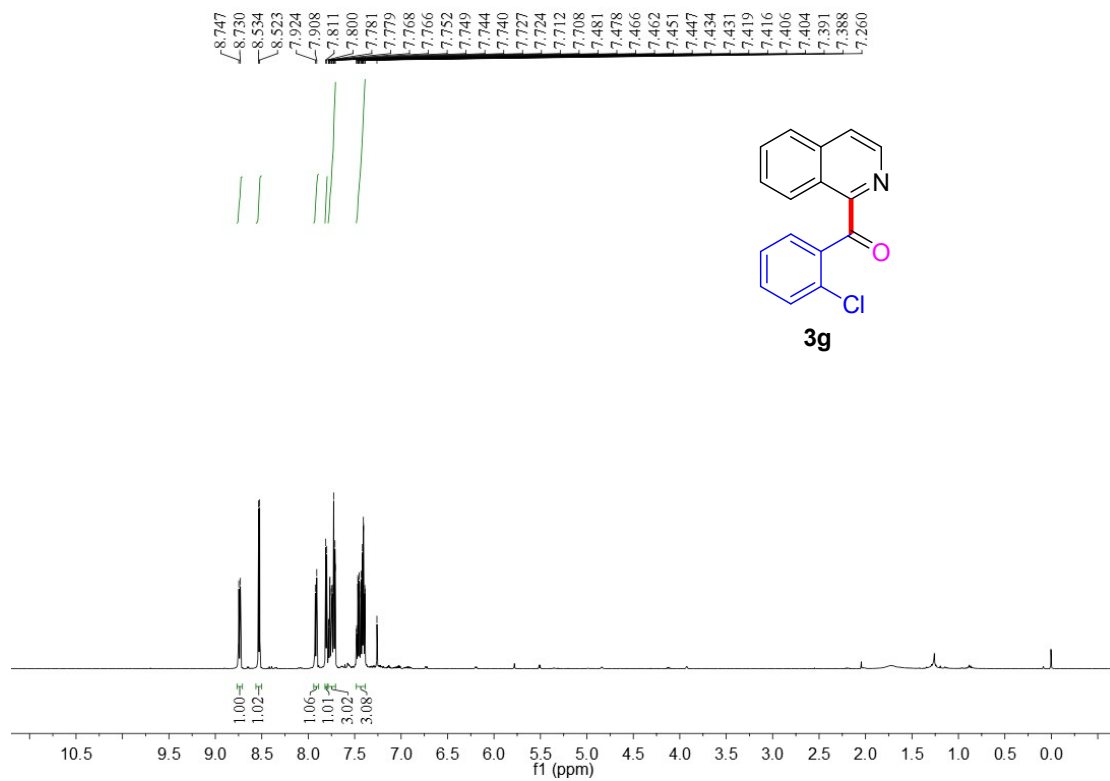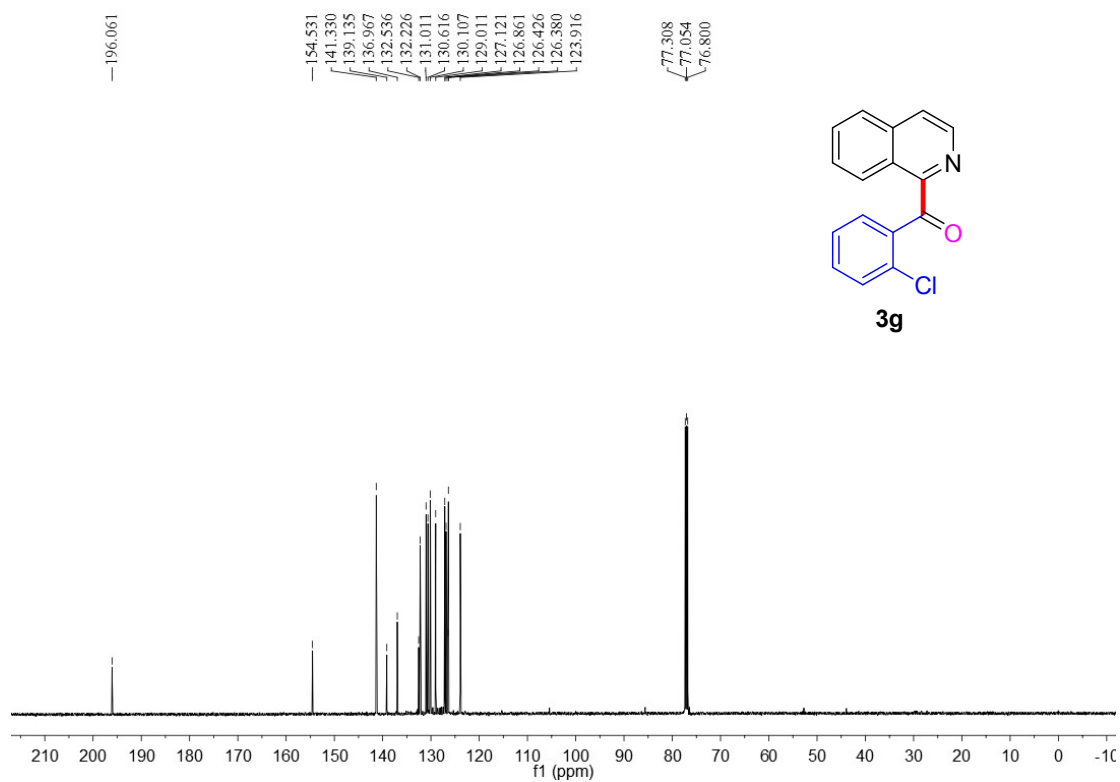

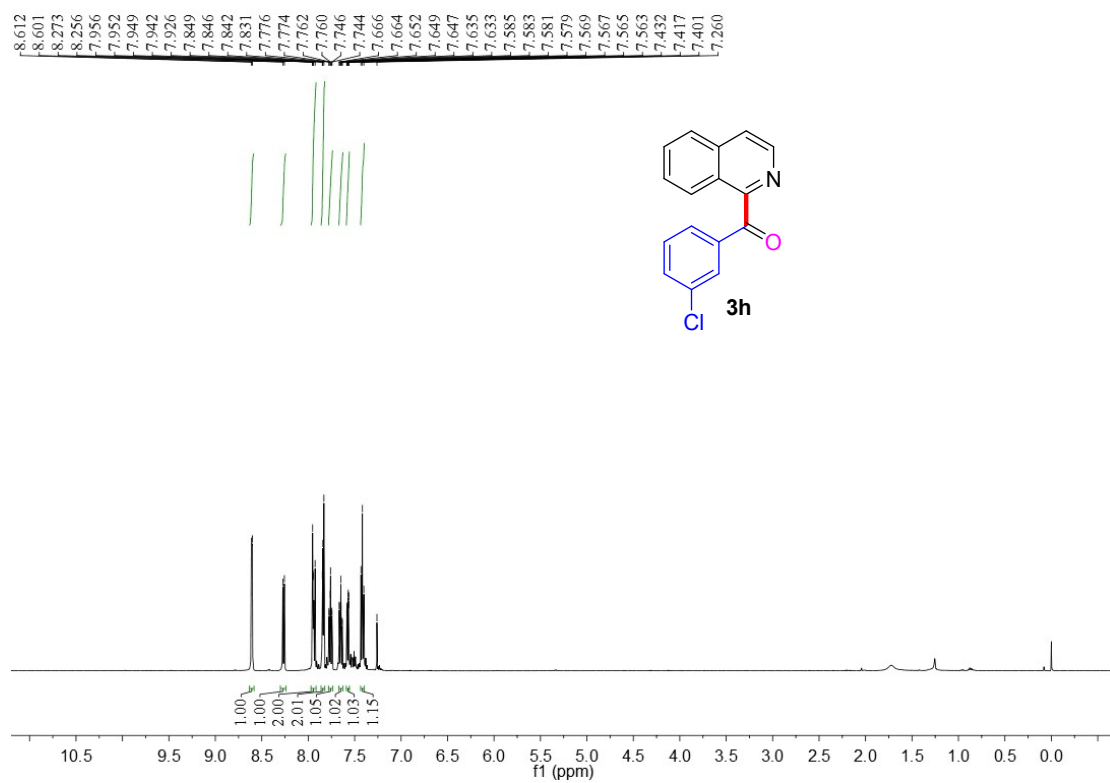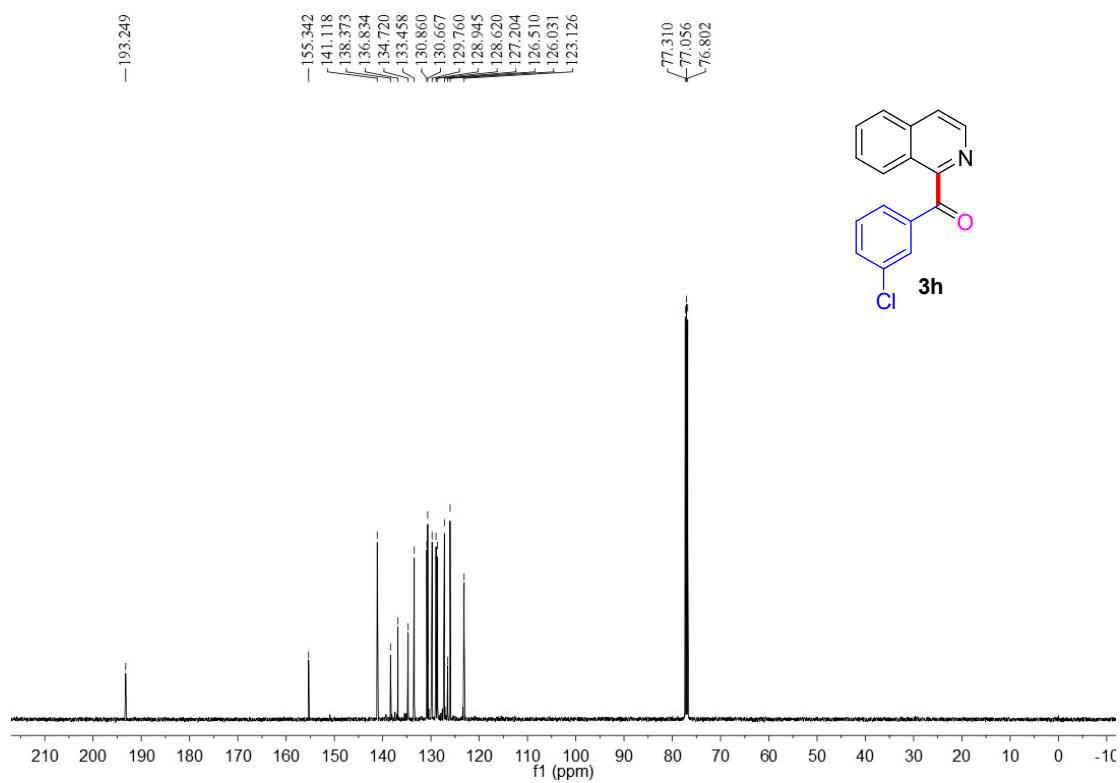

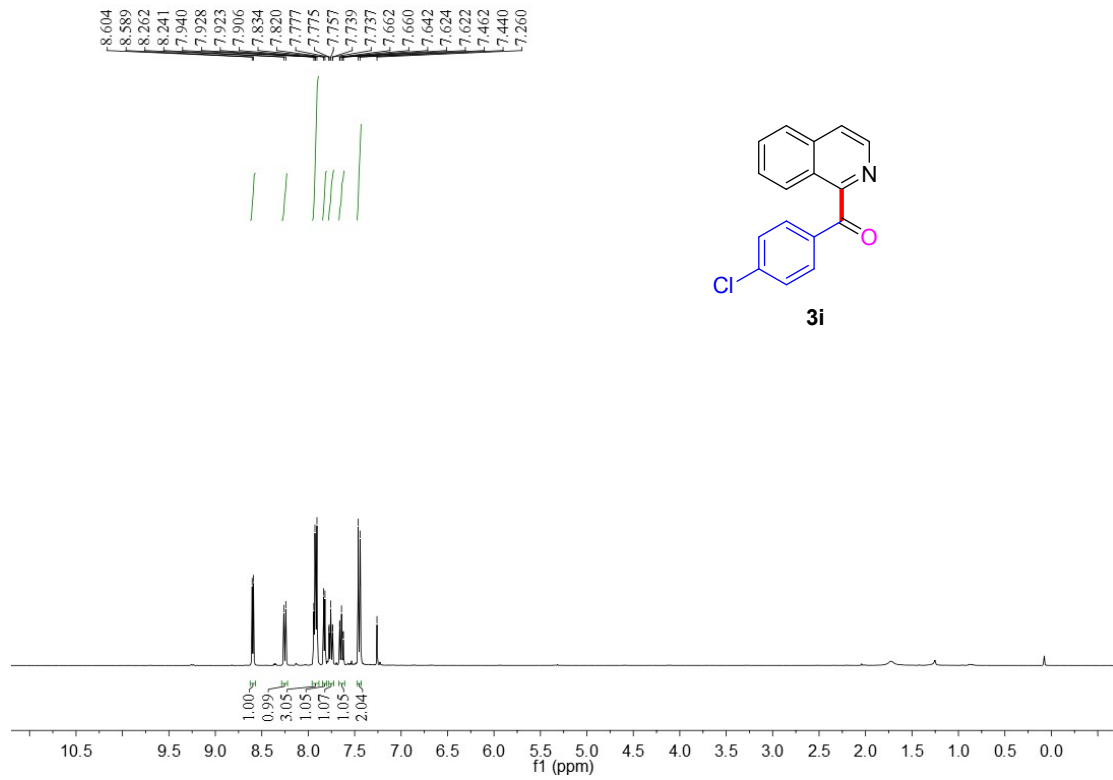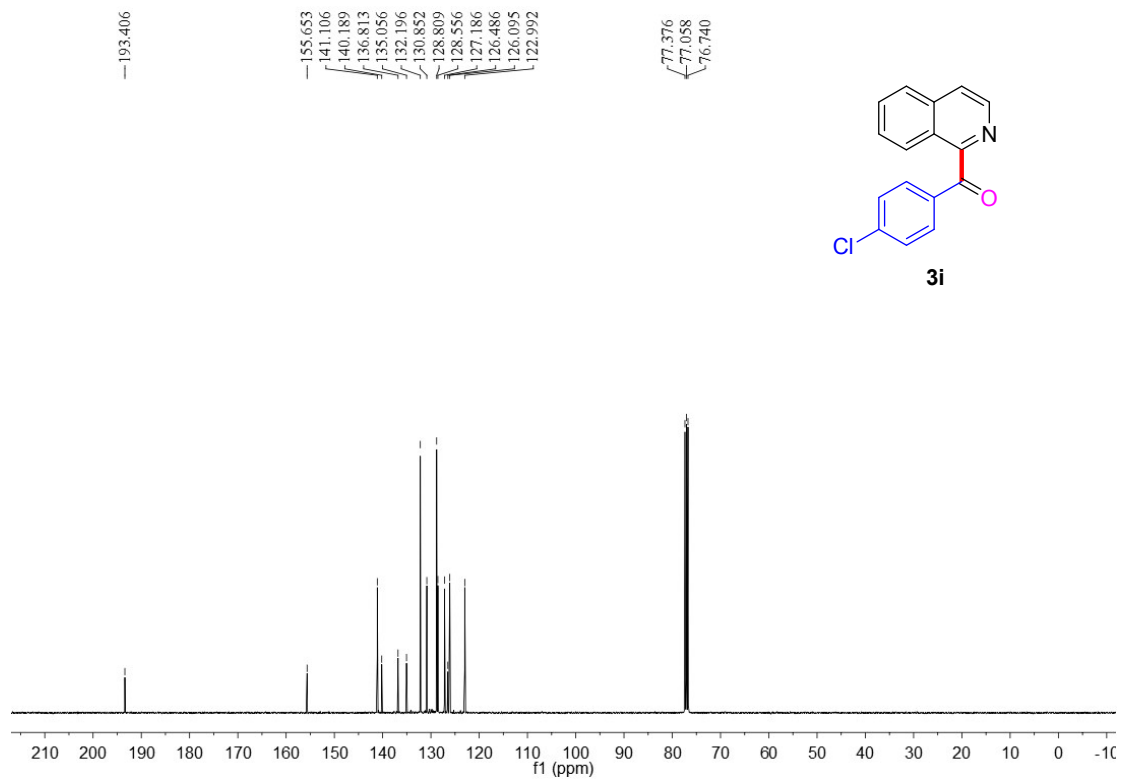

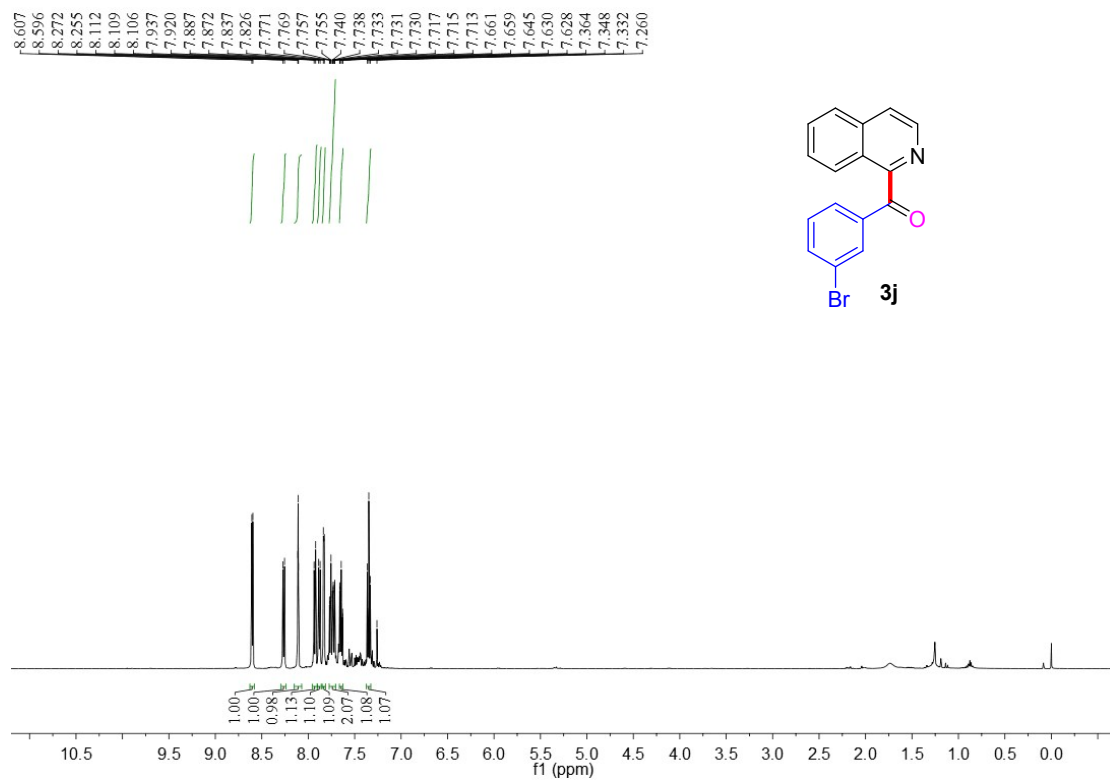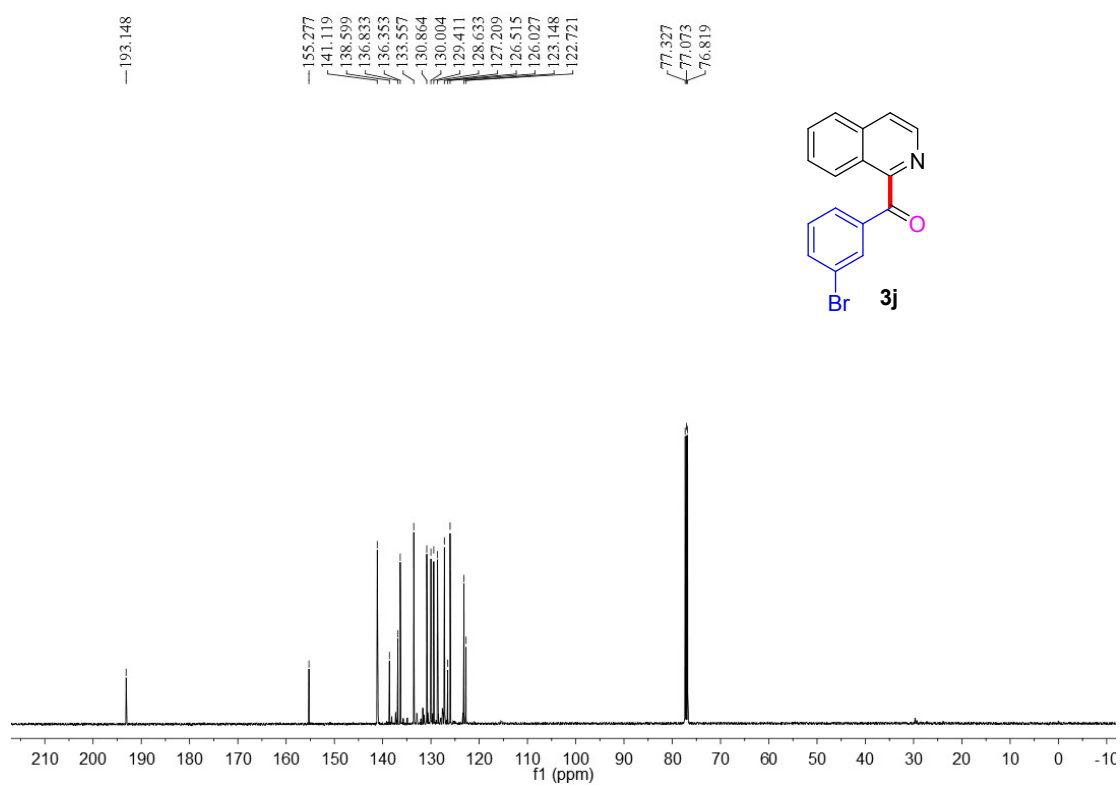



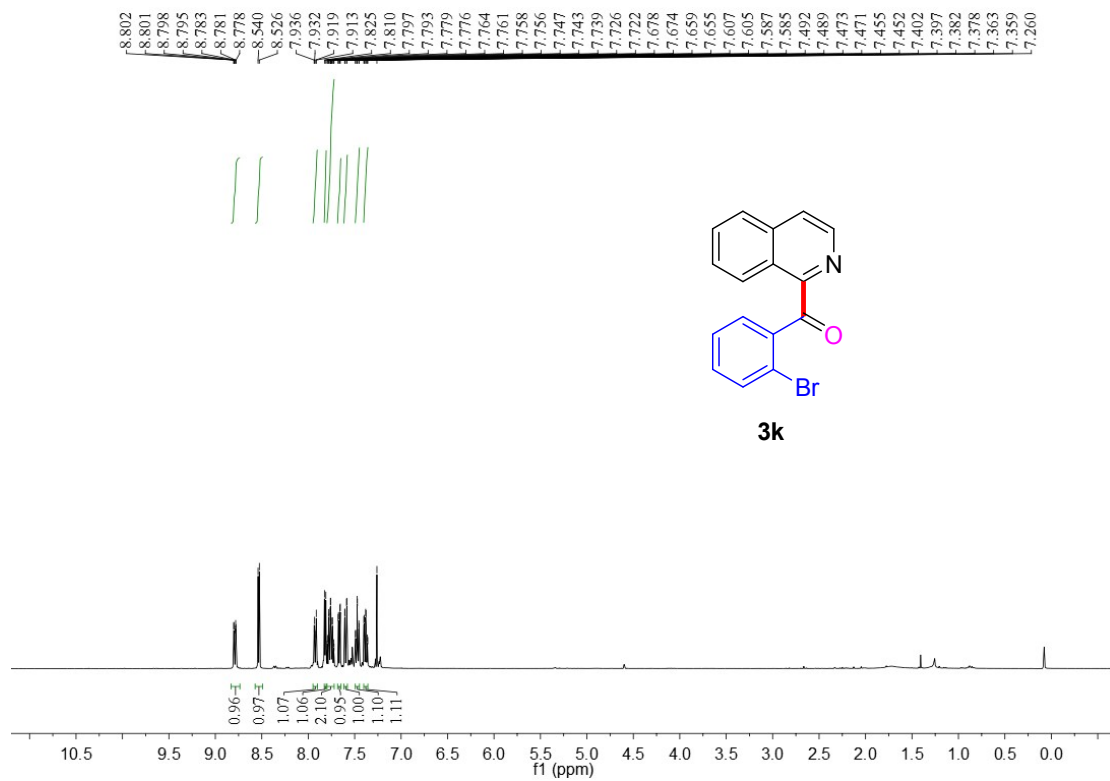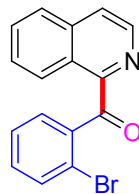

**3k**

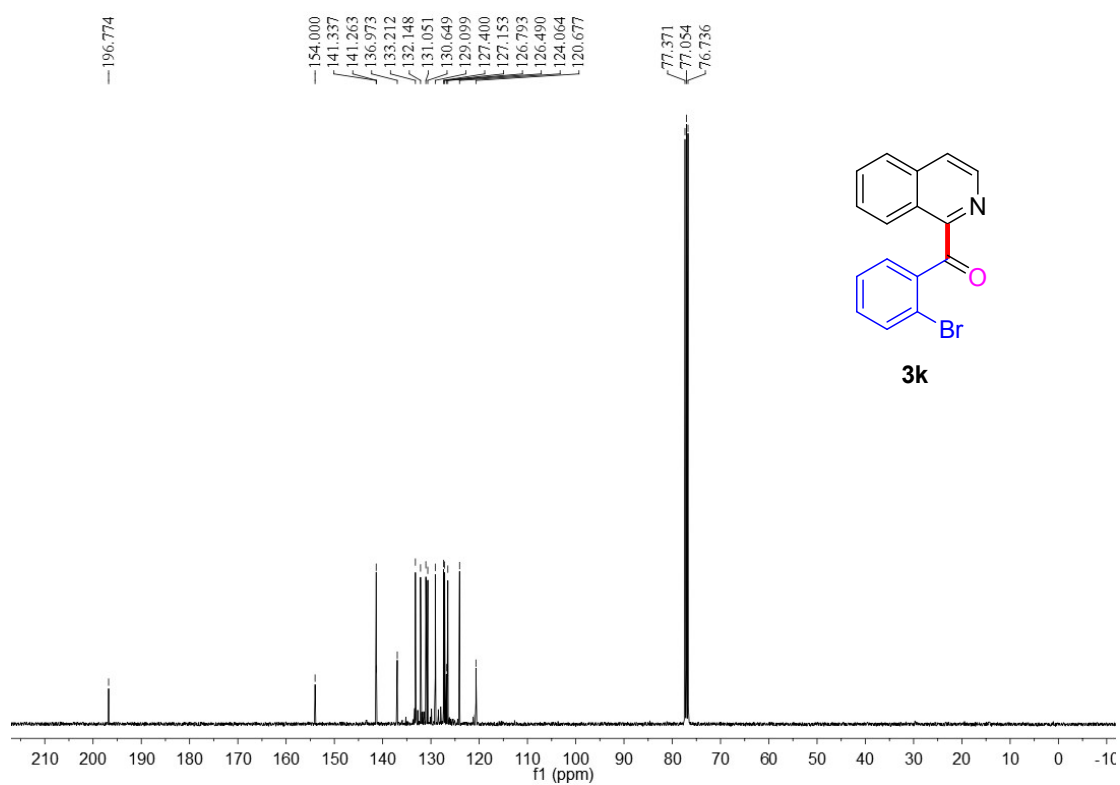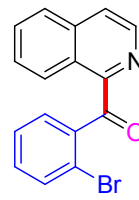

**3k**

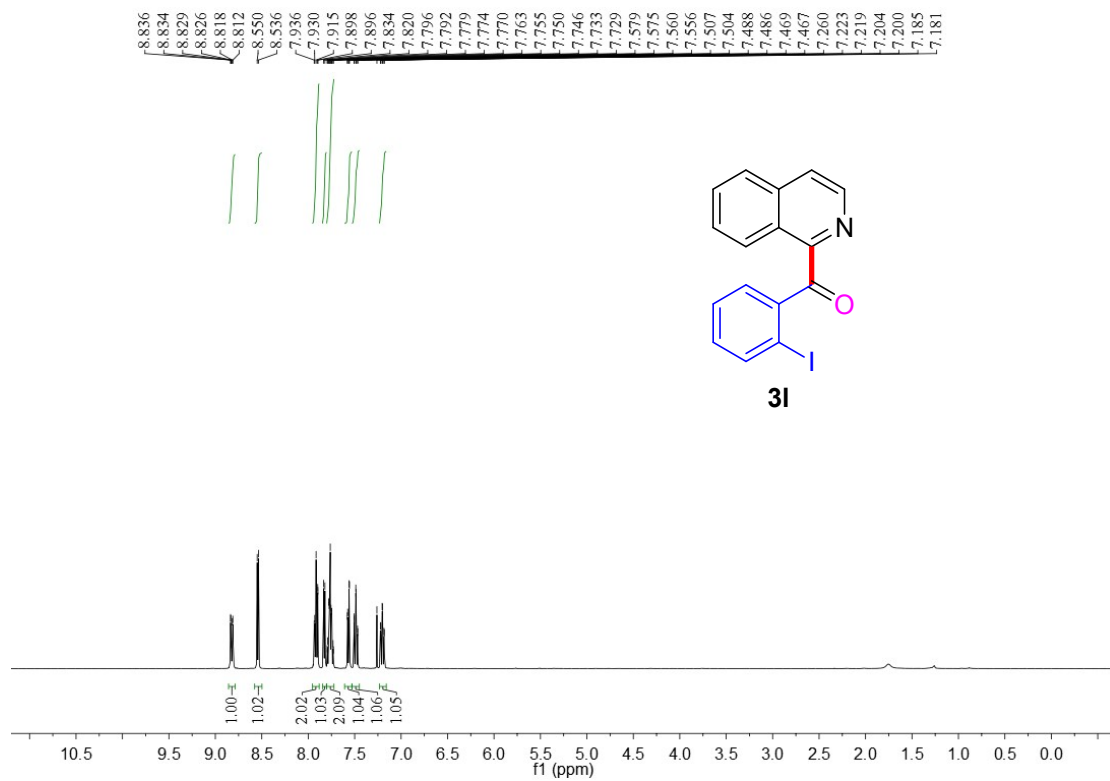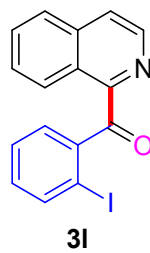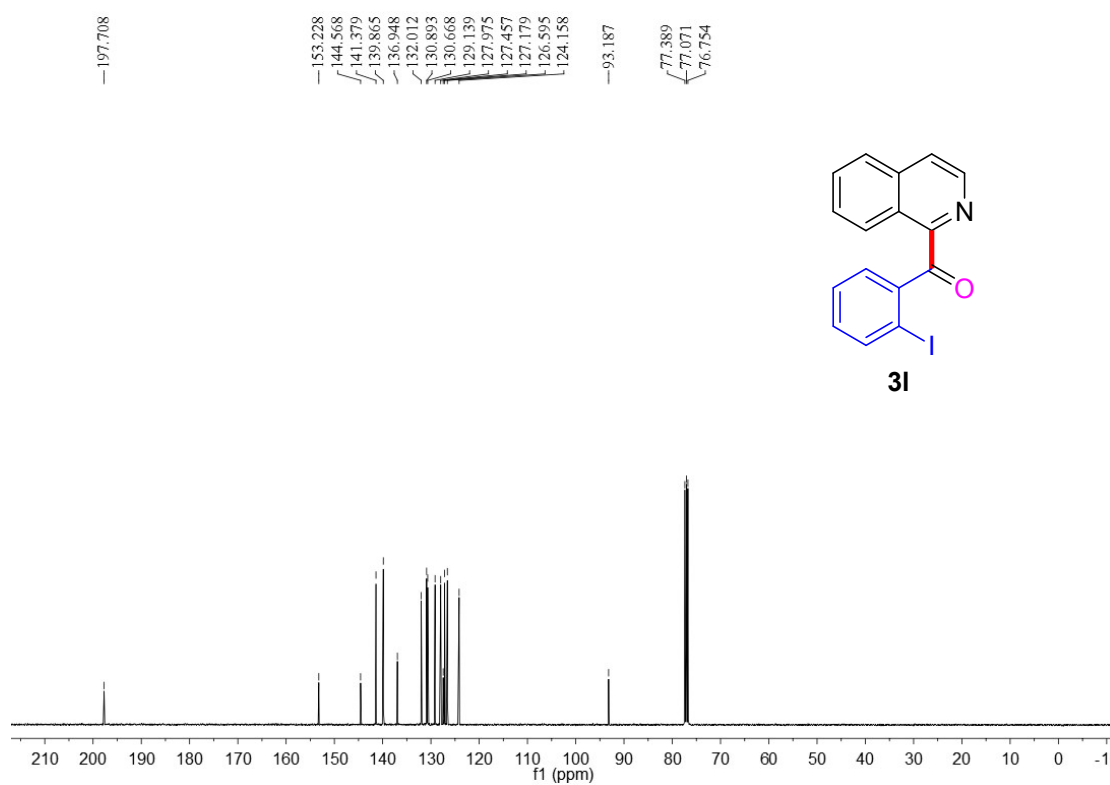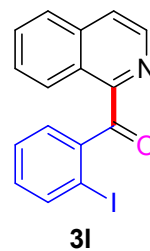

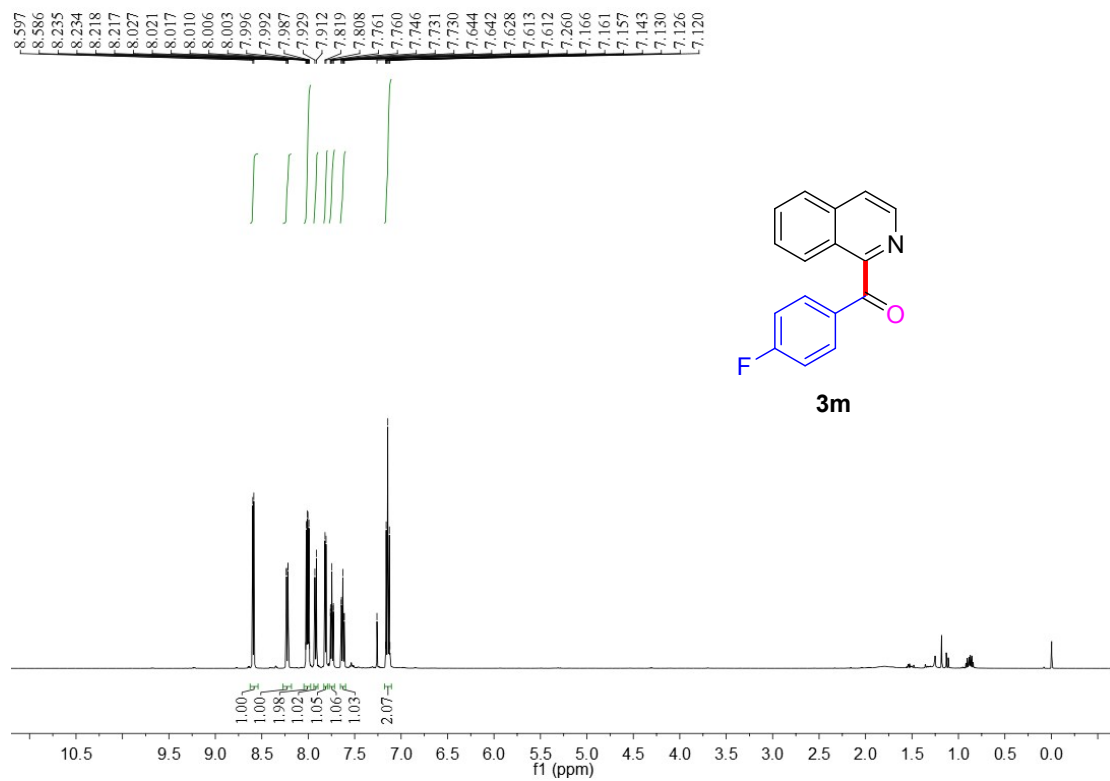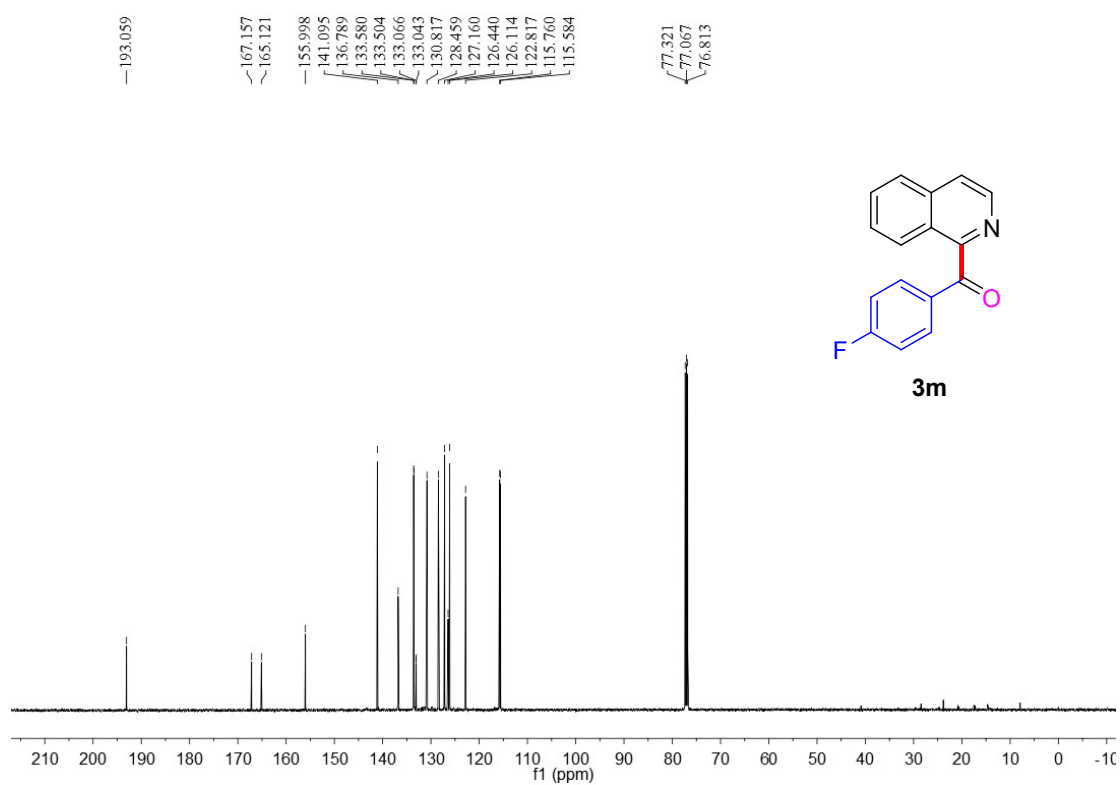

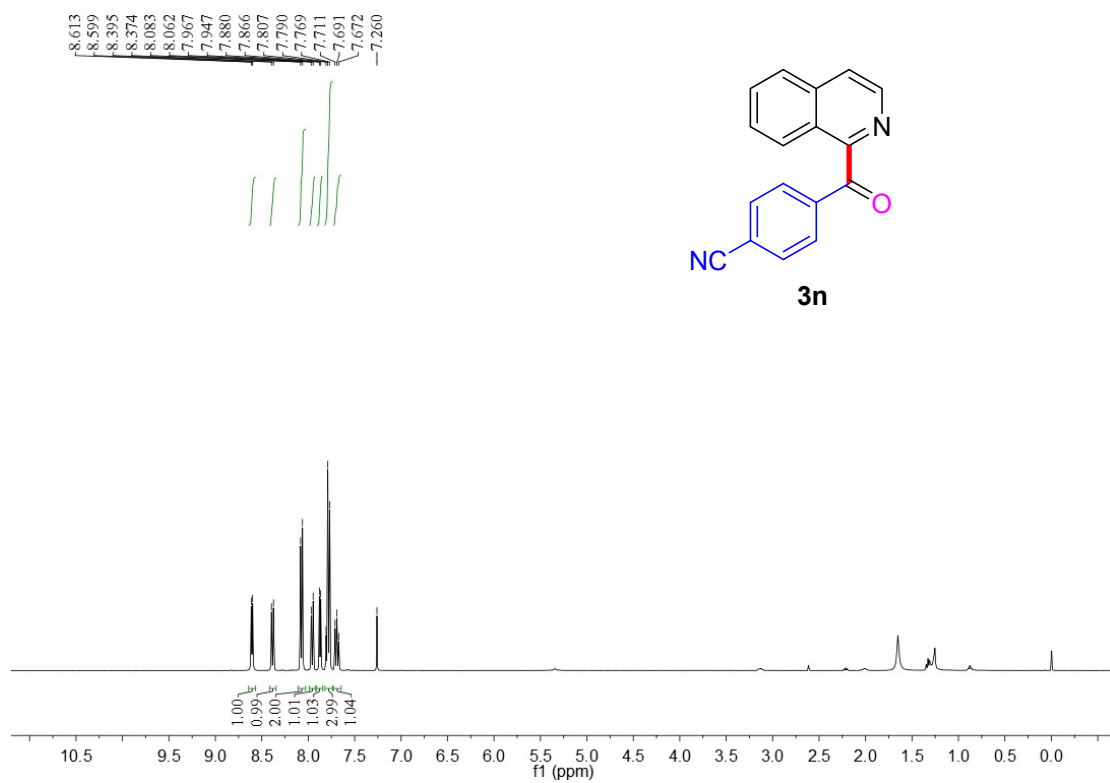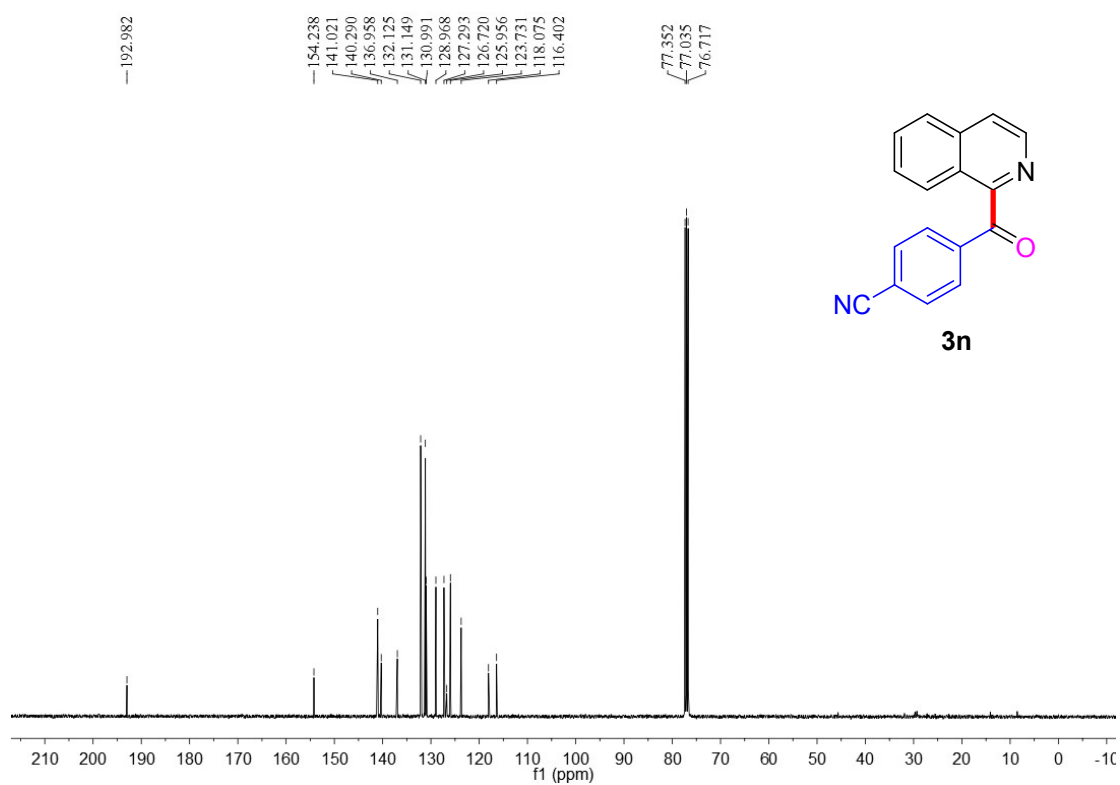

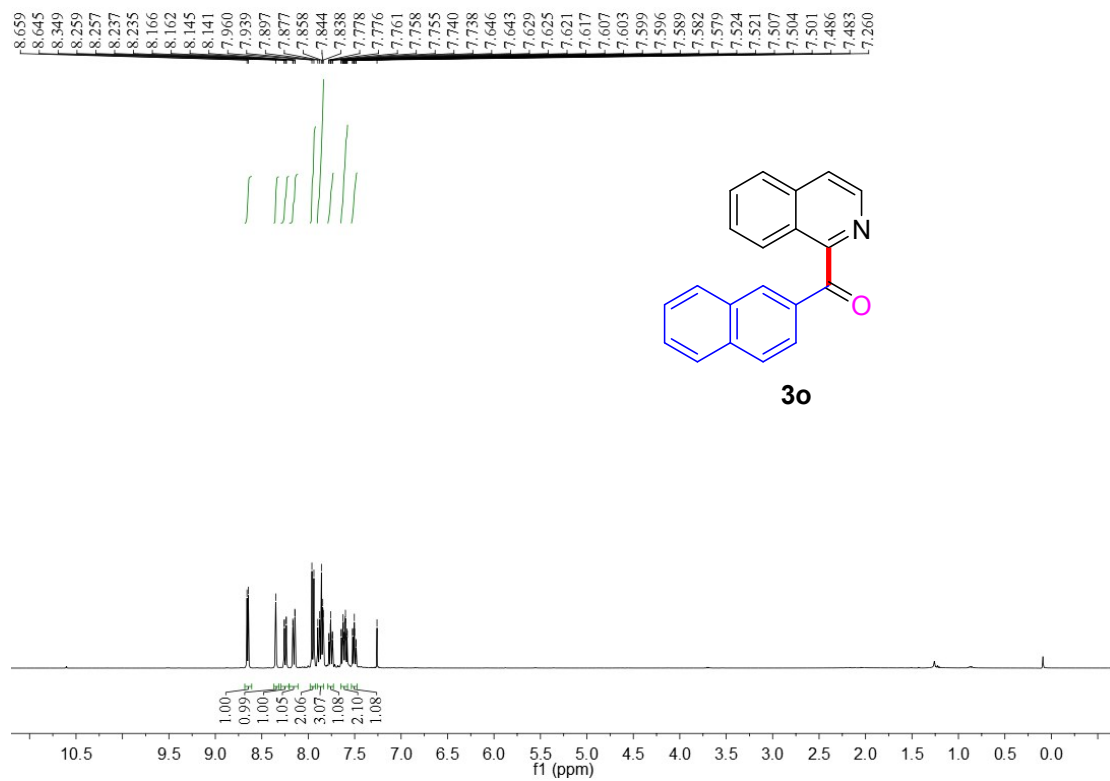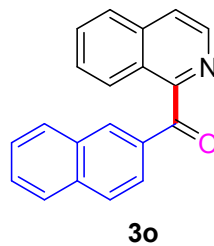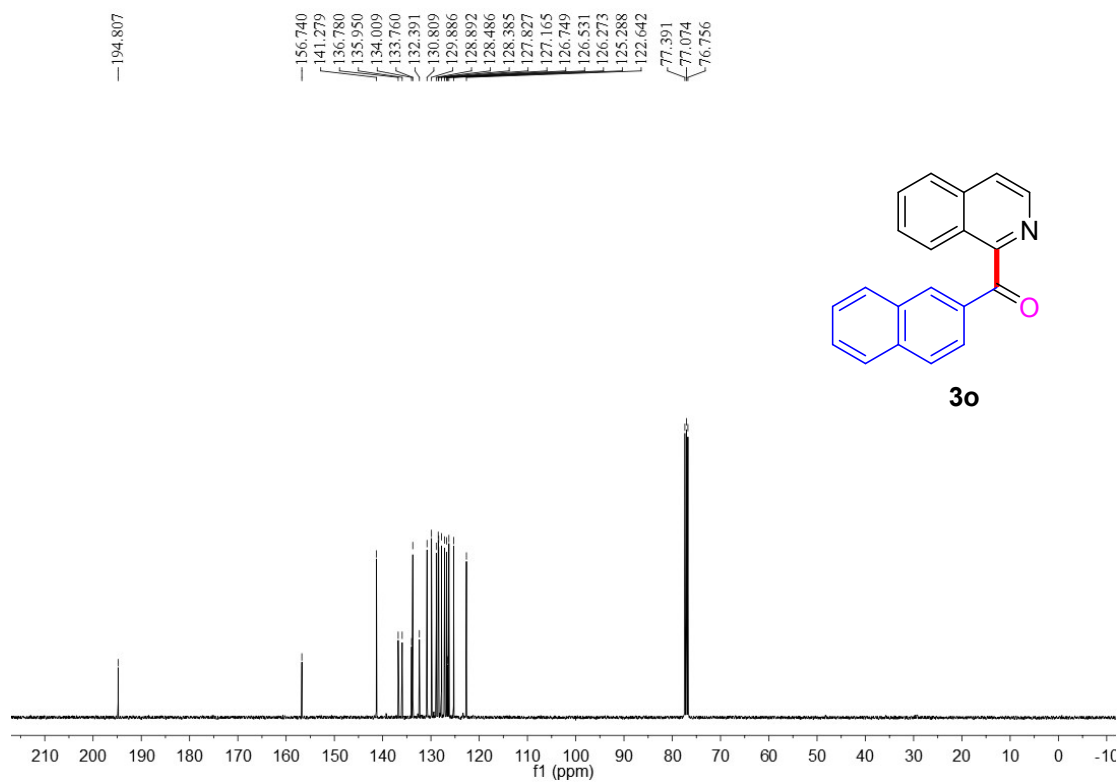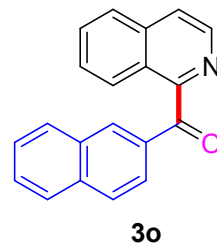

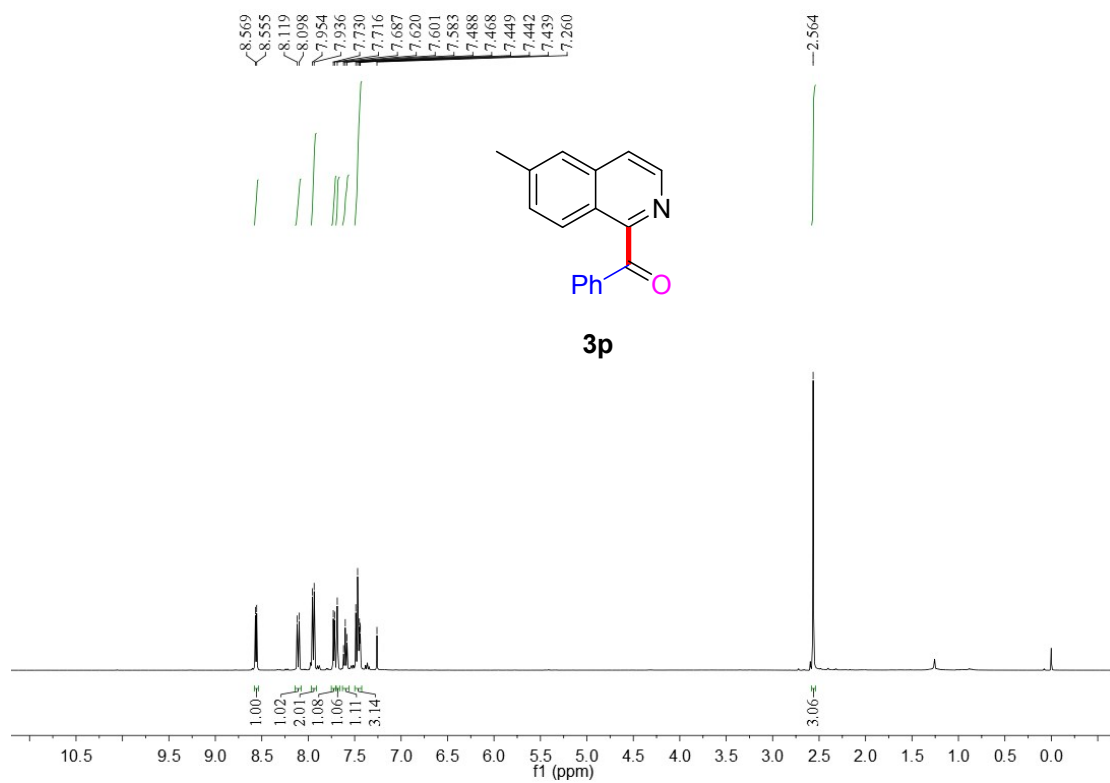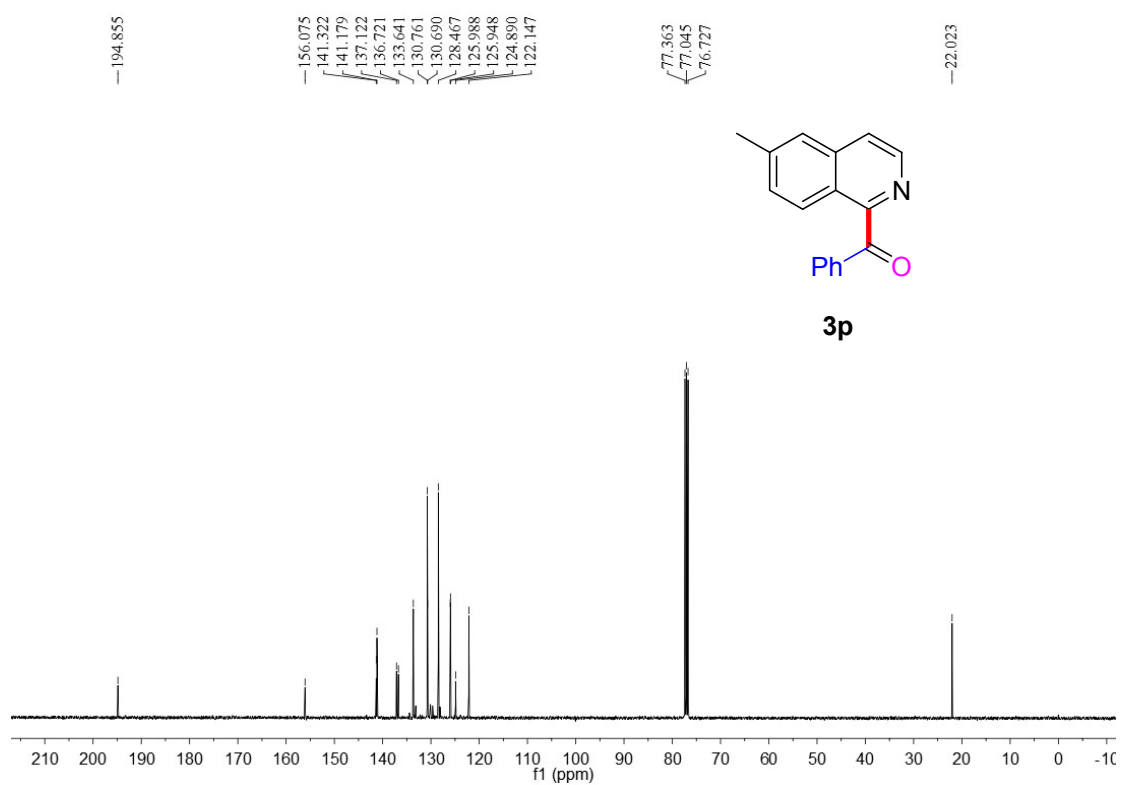

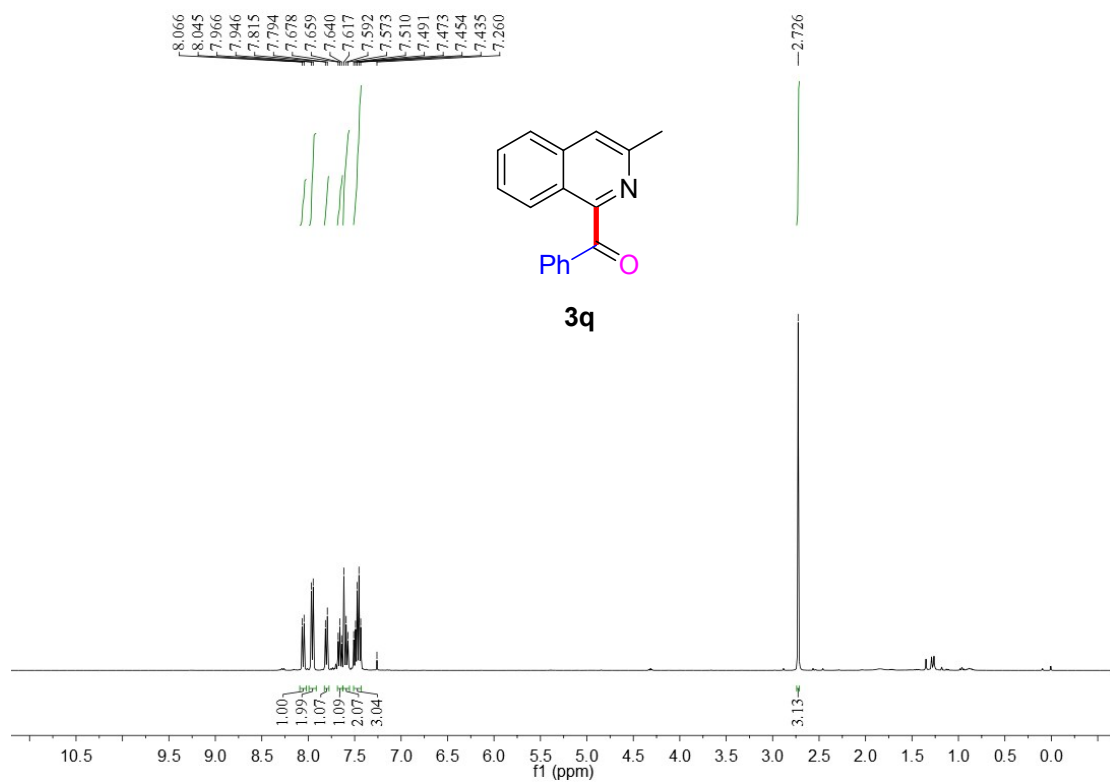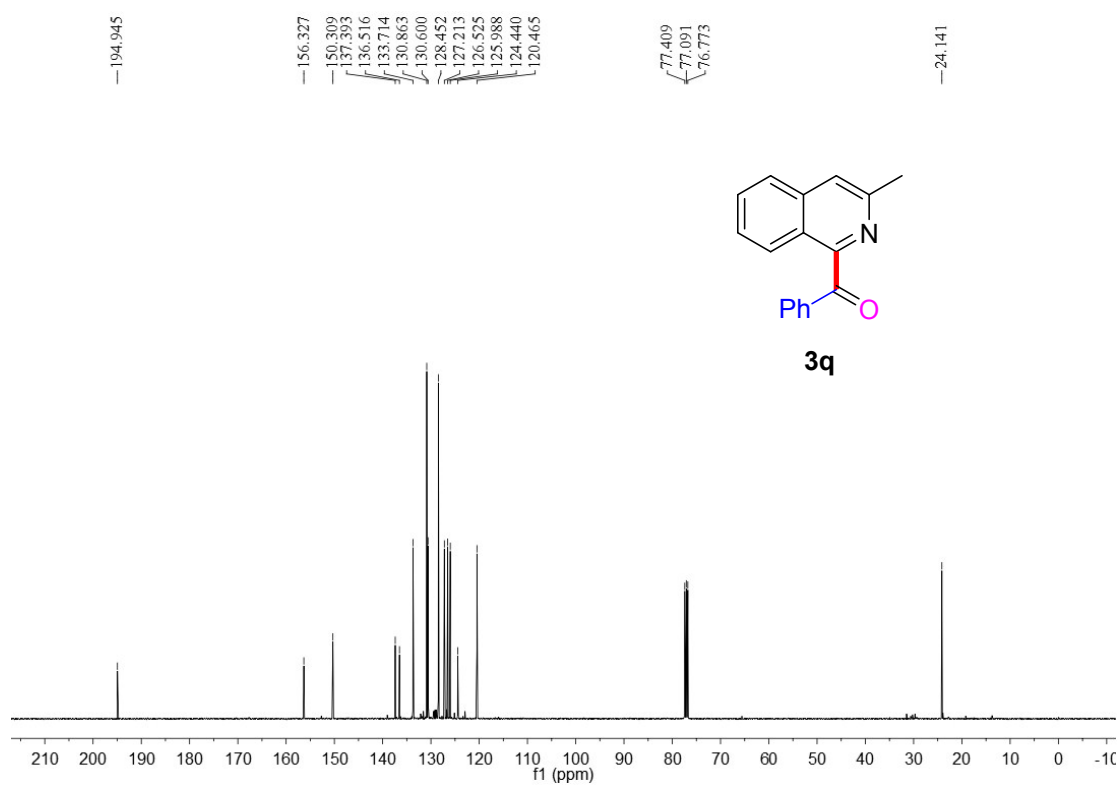

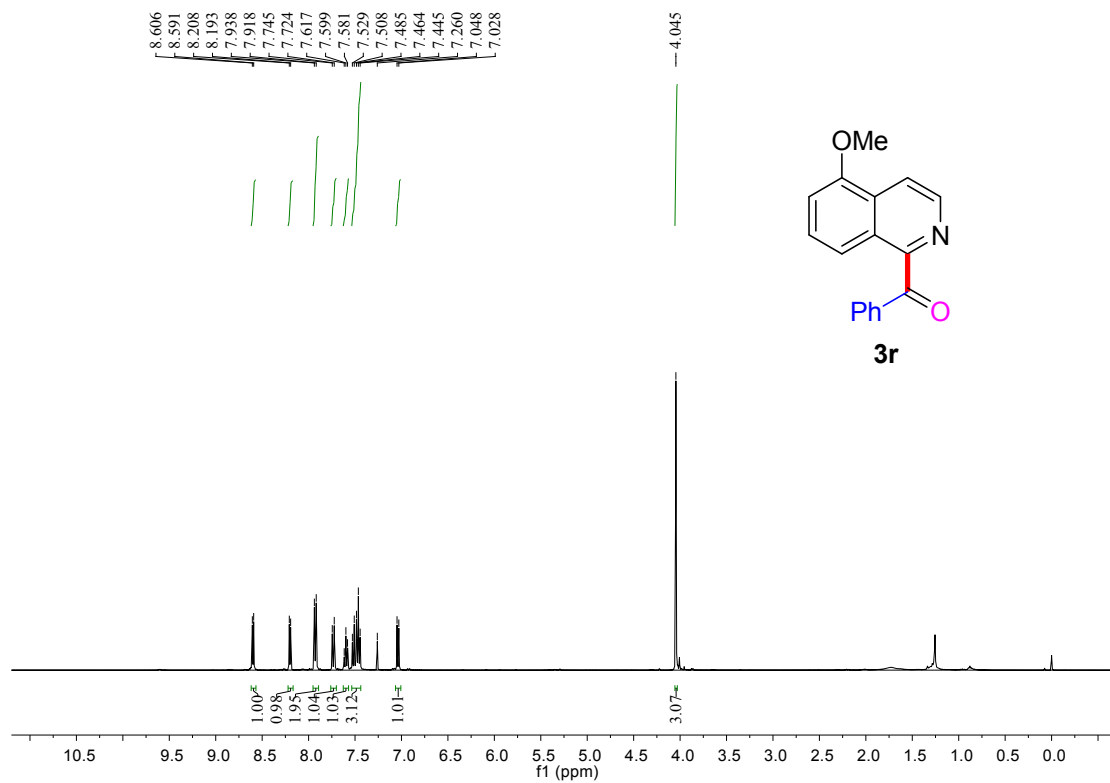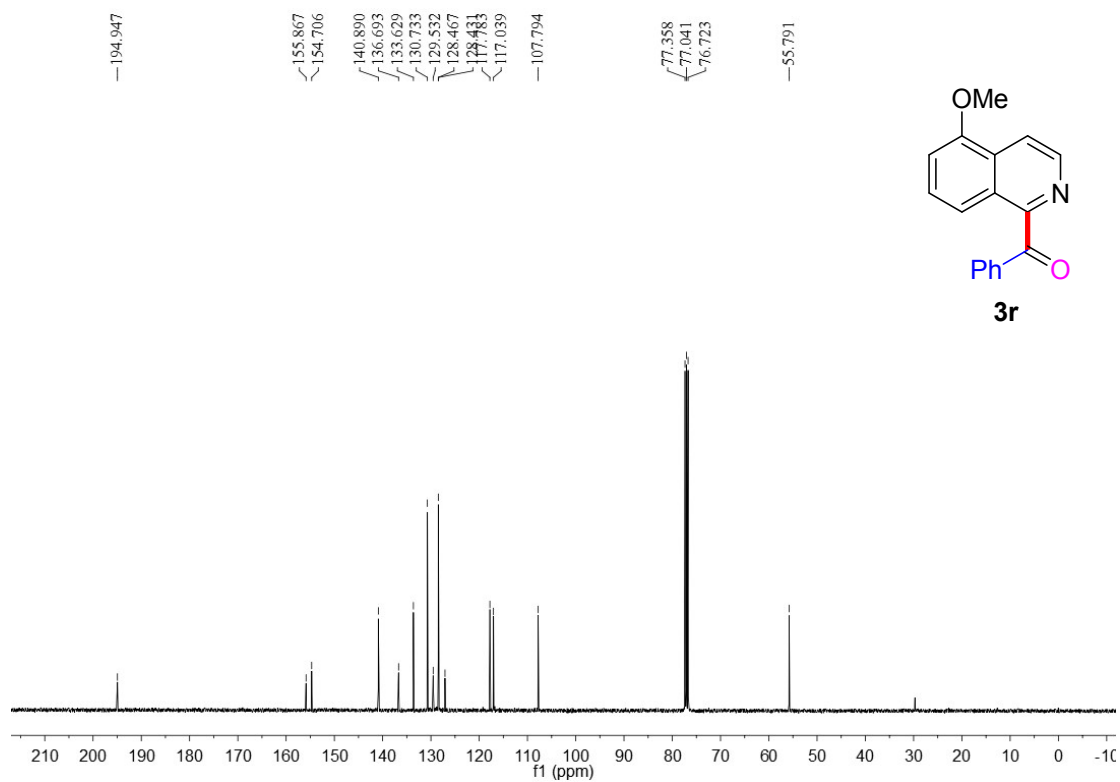



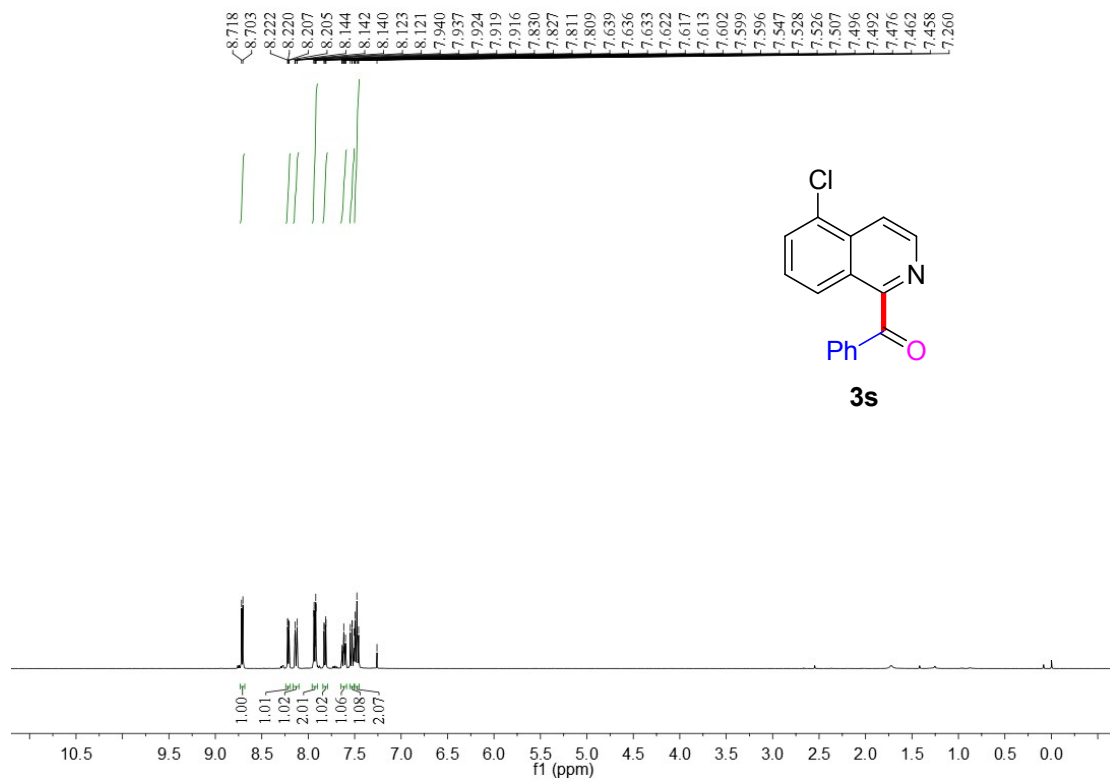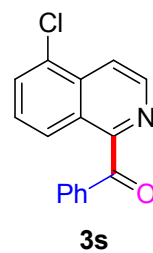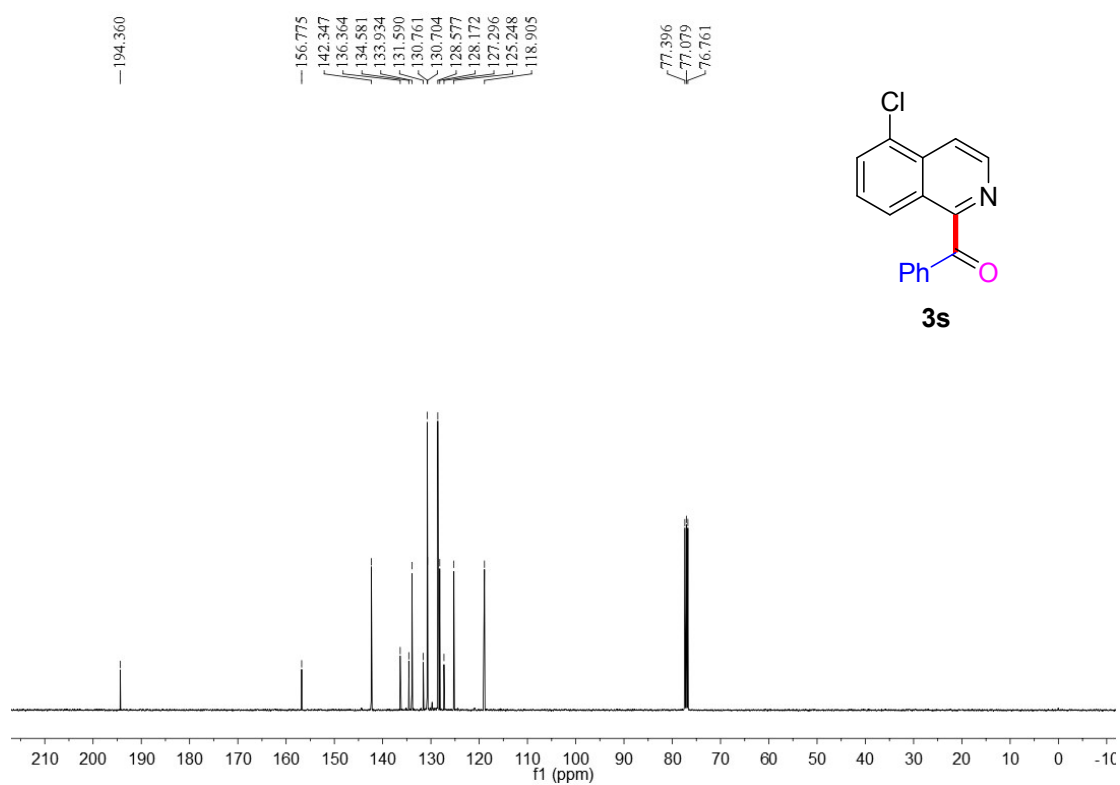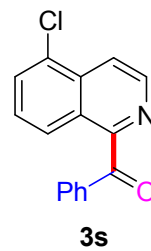

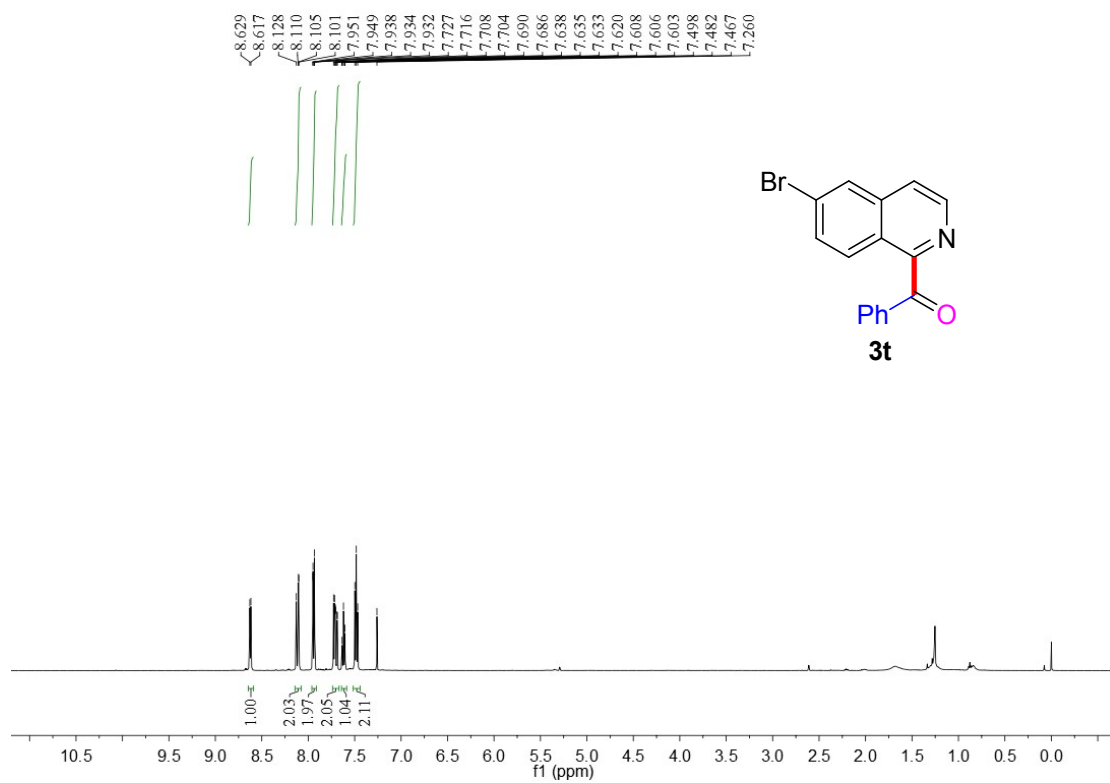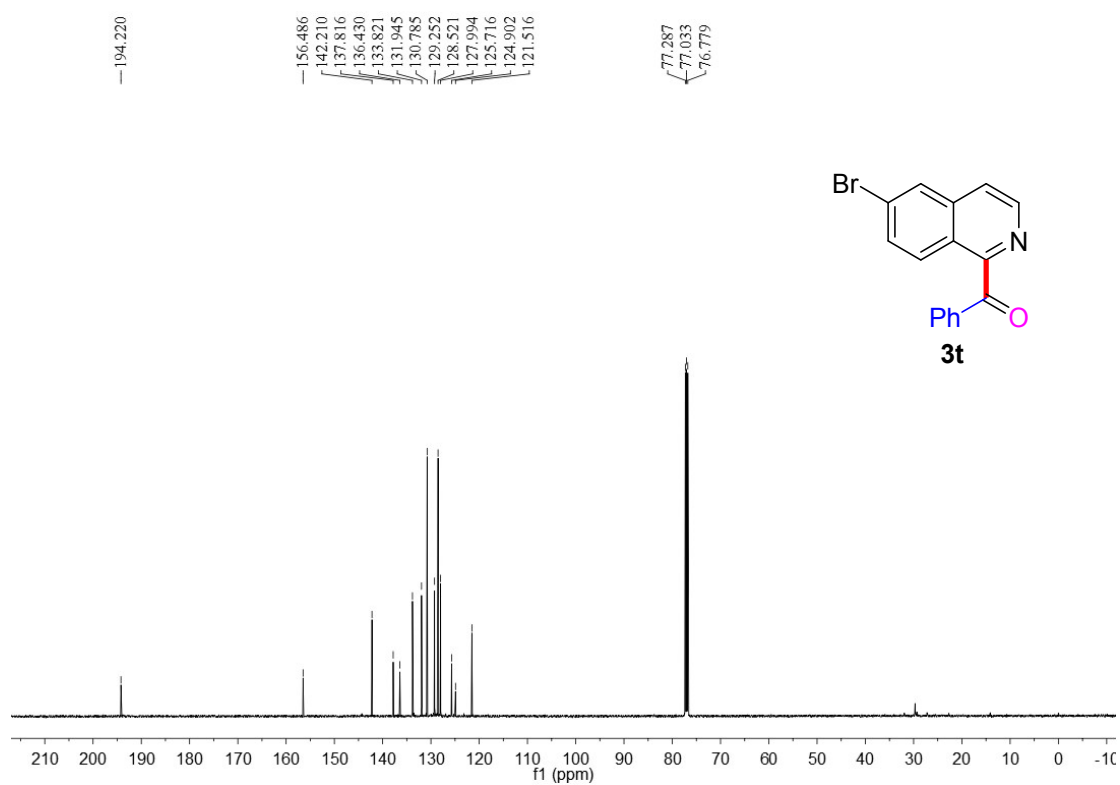

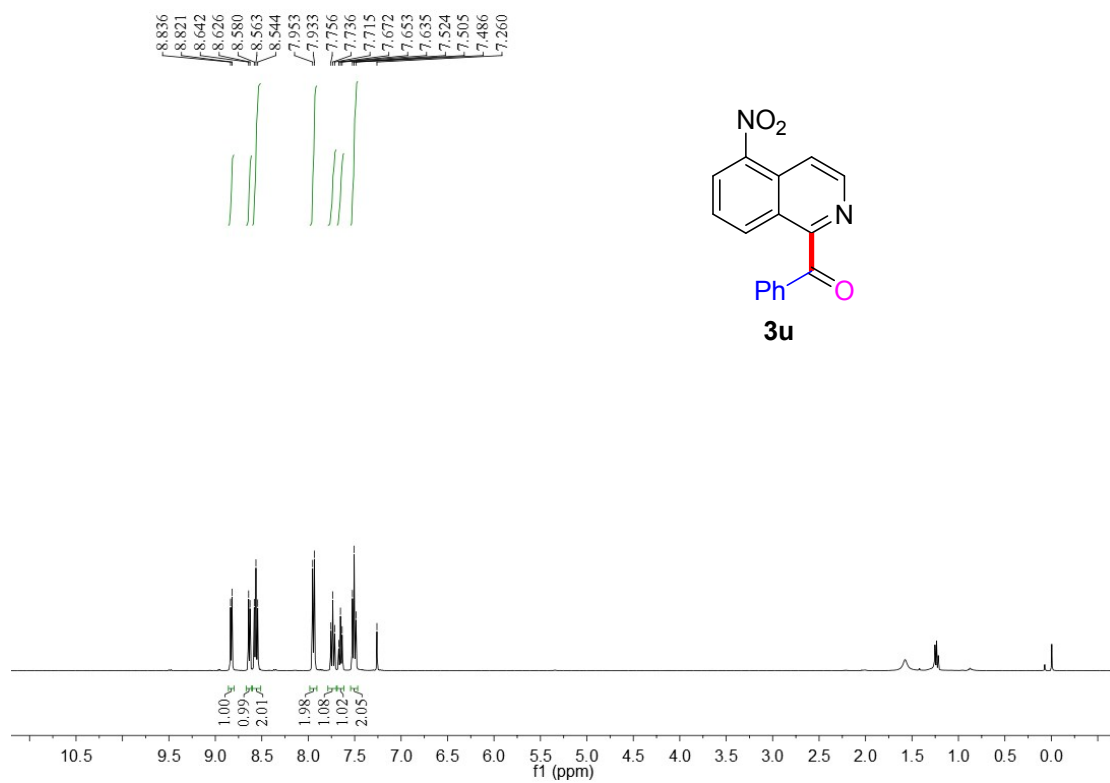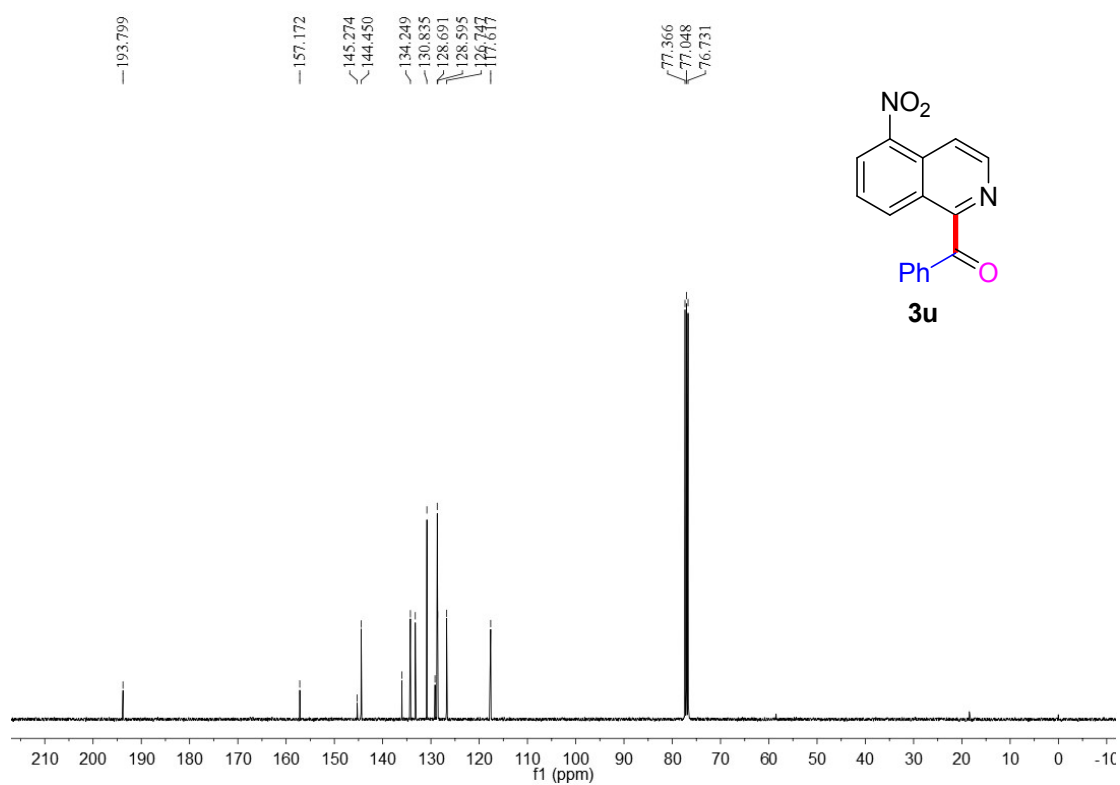

# Copies of HRMS Spectra of all compounds

T: FTMS + p ESI Full ms [210.00-240.00]

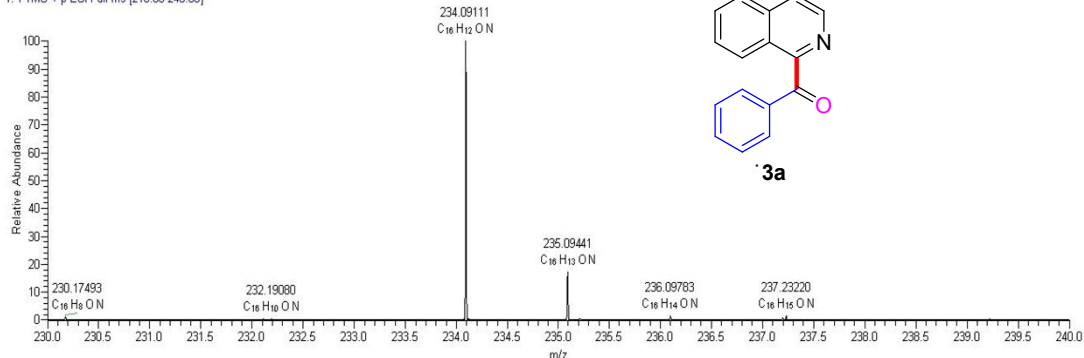

T: FTMS + p ESI Full ms [250.00-280.00]

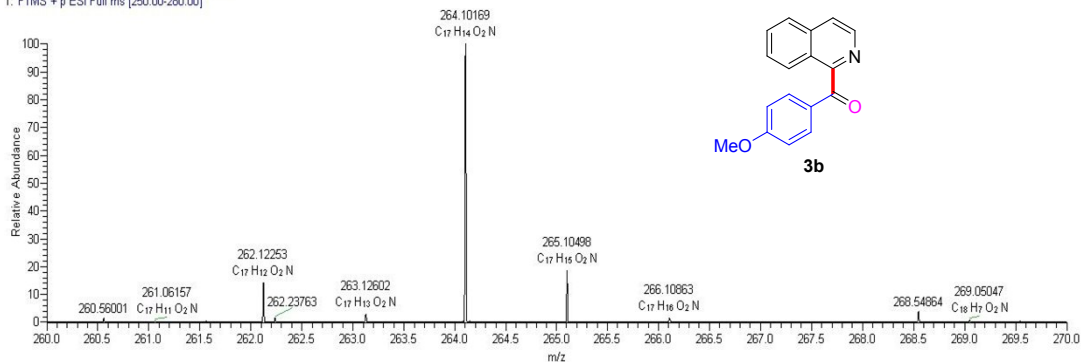

T: FTMS + p ESI Full ms [250.00-280.10]

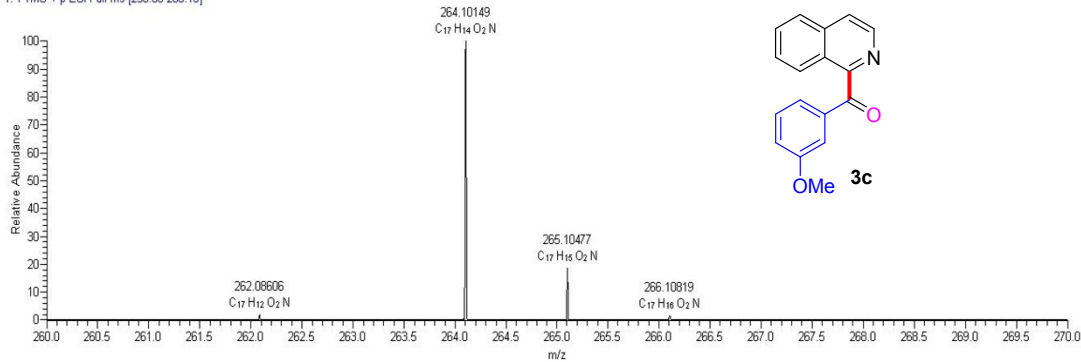

T: FTMS + p ESI Full ms [270.00-330.10]

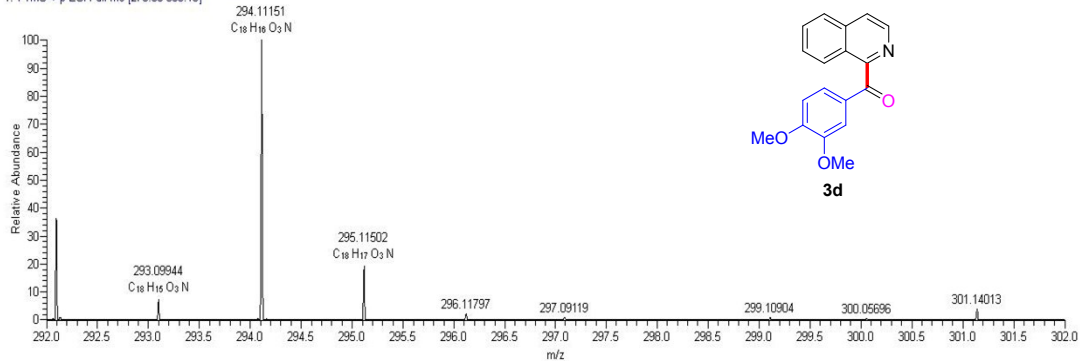

T: FTMS + p ESI Full ms [260.00-290.10]

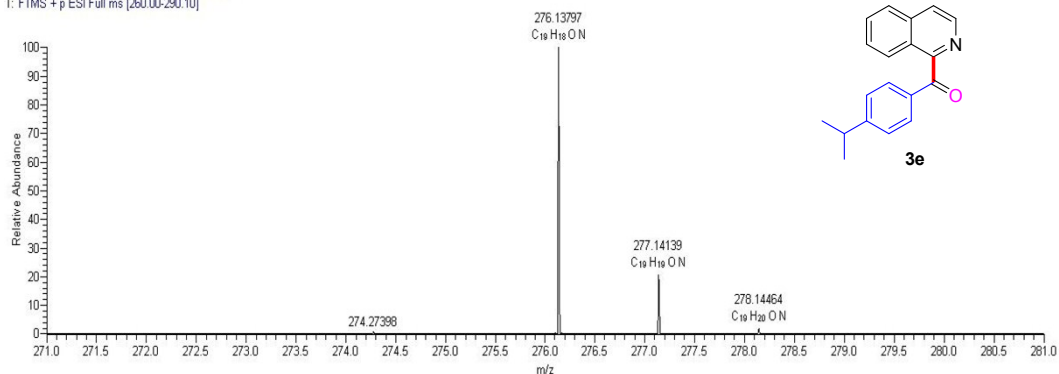

T: FTMS + p ESI Full ms [230.00-260.00]

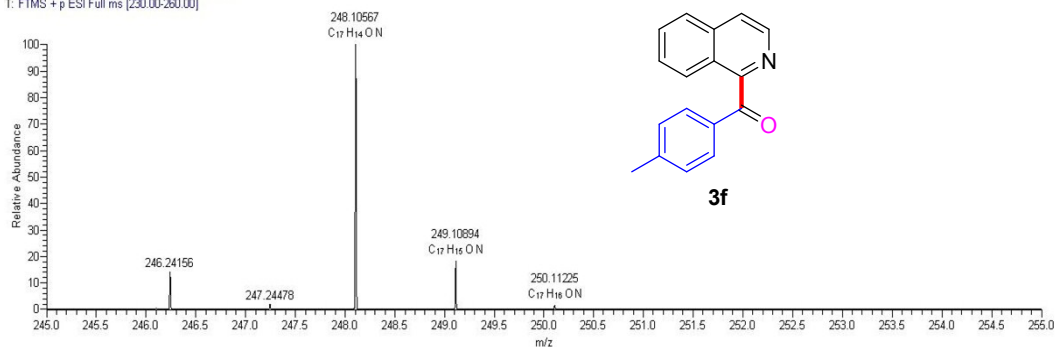

T: FTMS + p ESI Full ms [250.00-280.00]

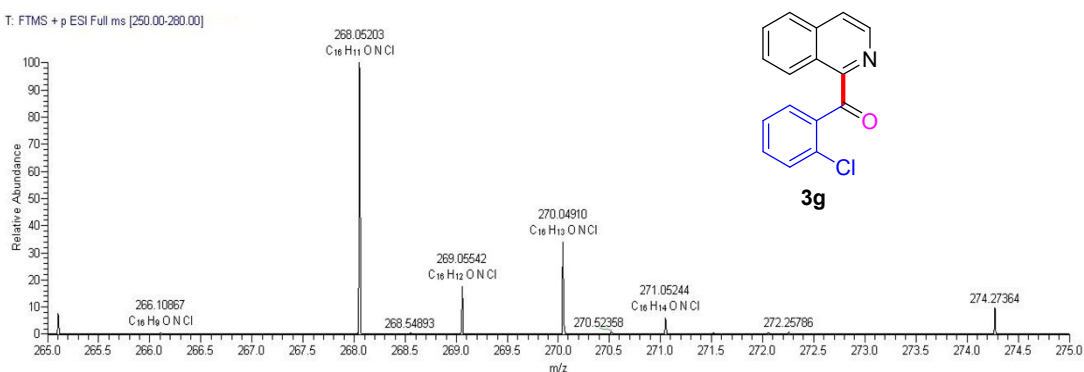

T: FTMS + p ESI Full lock ms [260.00-350.00]

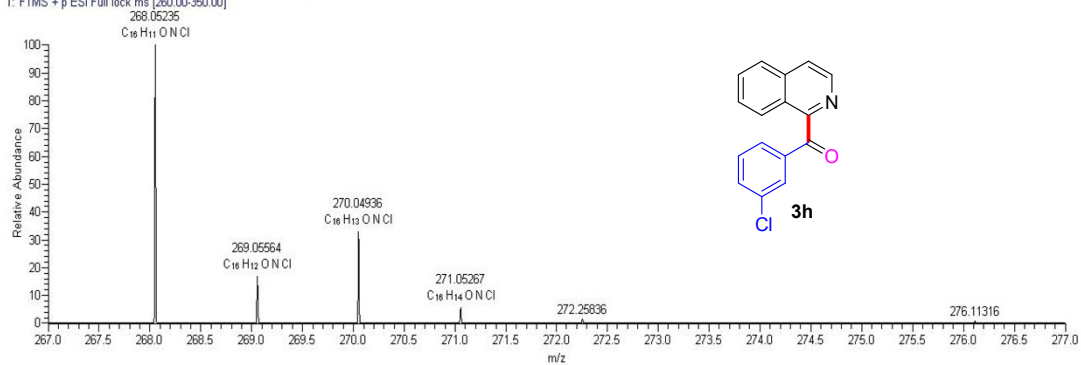

T: FTMS + p ESI Full ms [260.00-300.00]

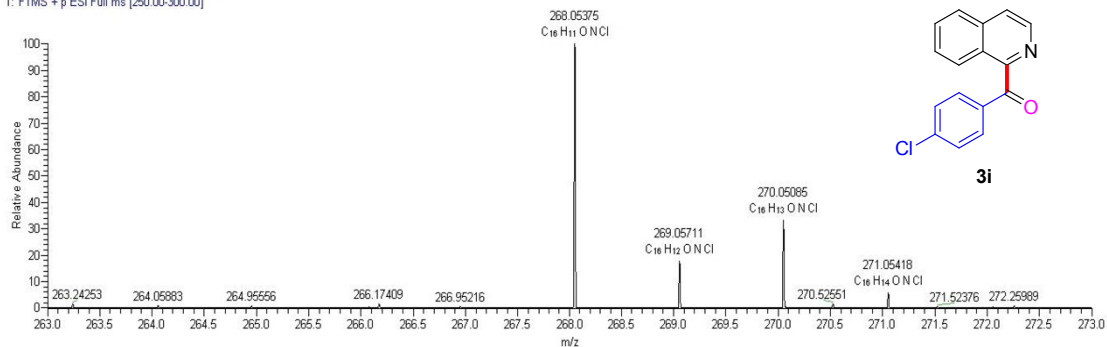

T: FTMS + p ESI Full ms [300.00-320.10]

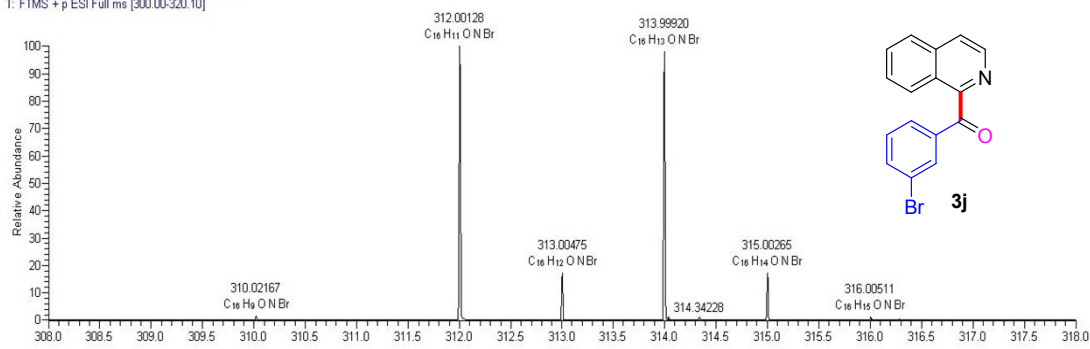

T: FTMS + p ESI Full ms [300.00-317.00]

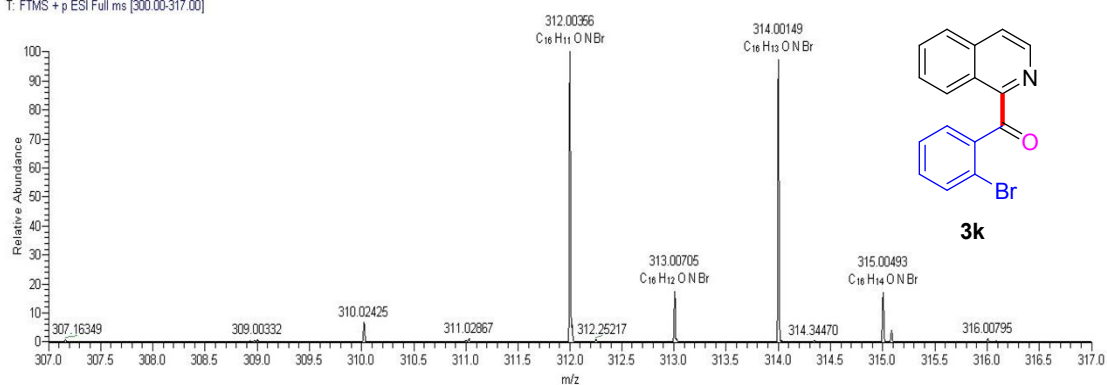

T: FTMS + p ESI Full ms [330.00-390.00]

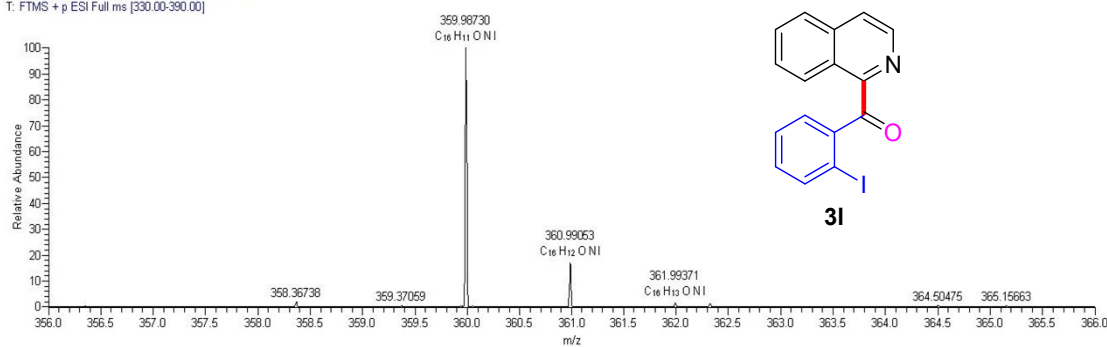

T: FTMS + p ESI Full ms [240.00-260.00]

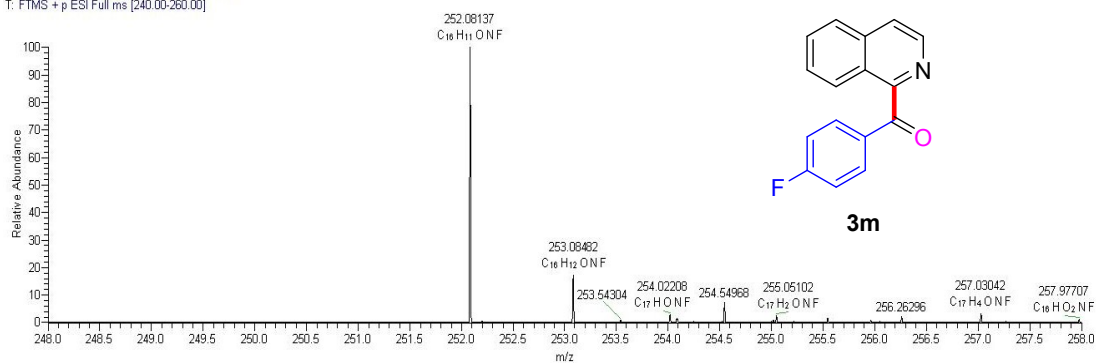

T: FTMS + p ESI Full ms [250.00-270.10]

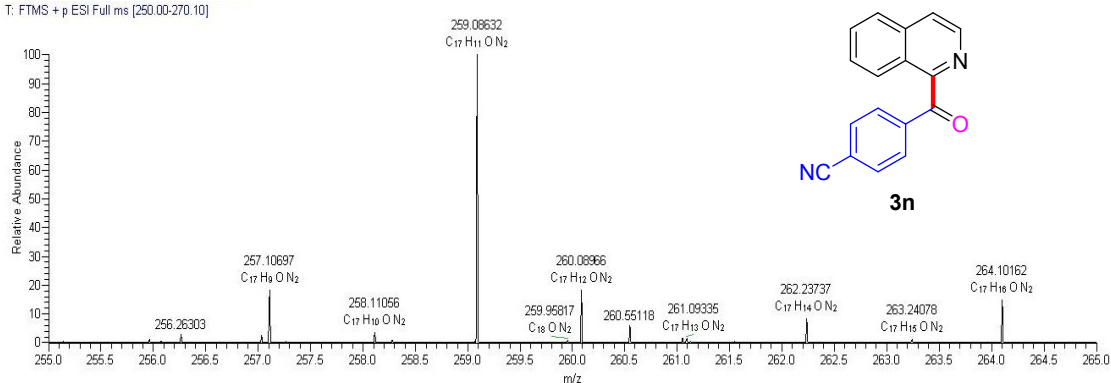

T: FTMS + p ESI Full ms [280.00-300.10]

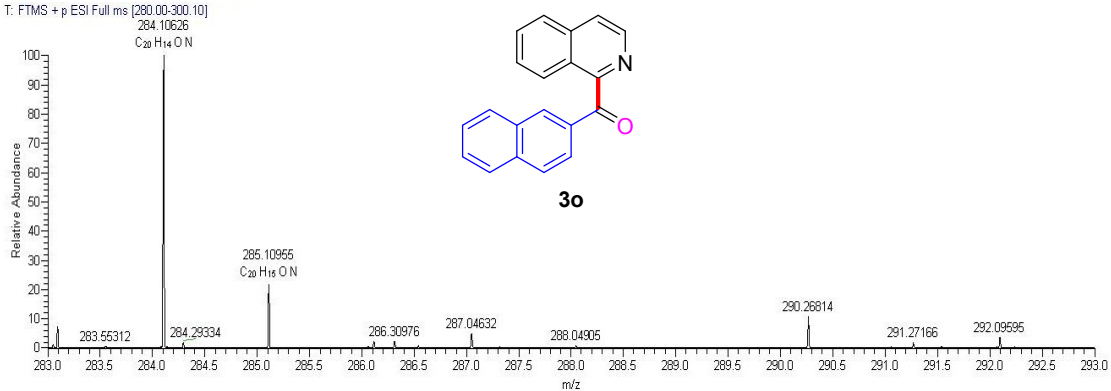

T: FTMS + p ESI Full ms [230.00-260.10]

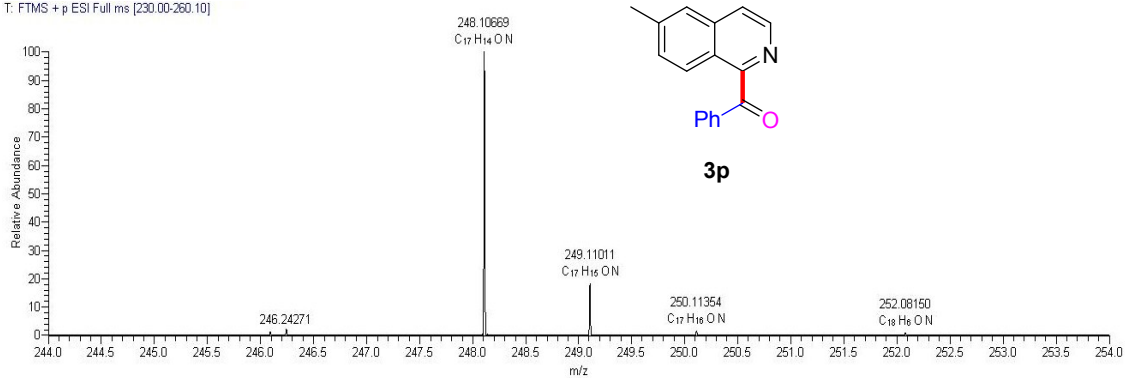

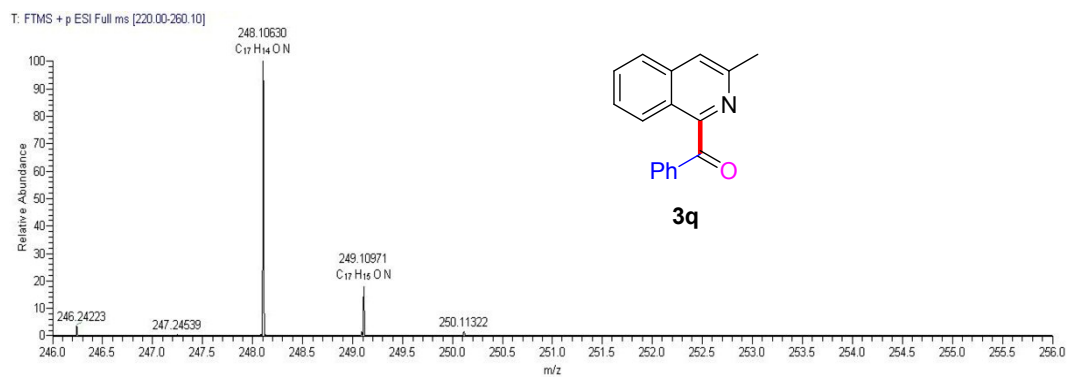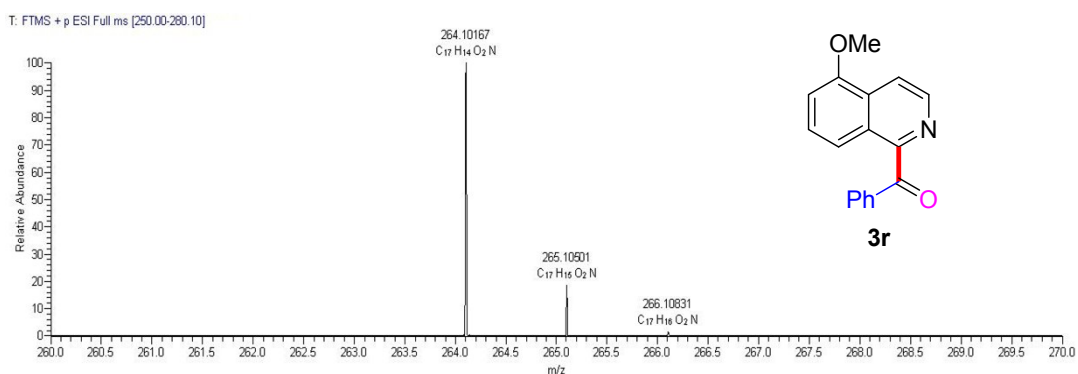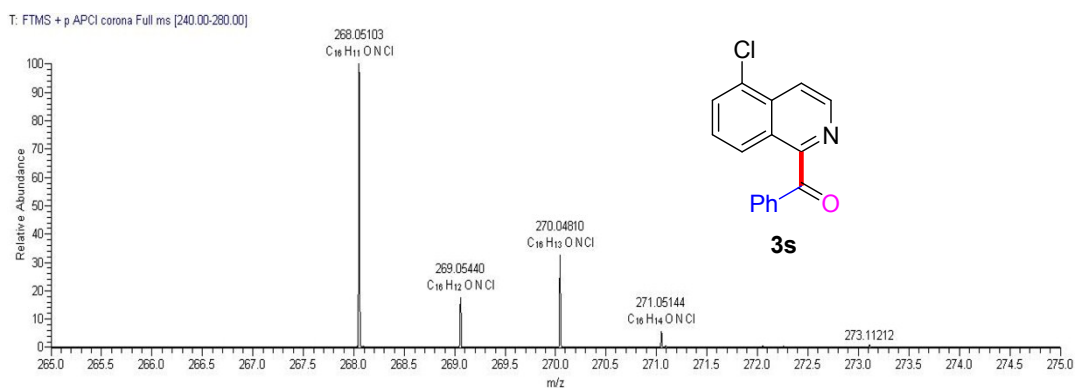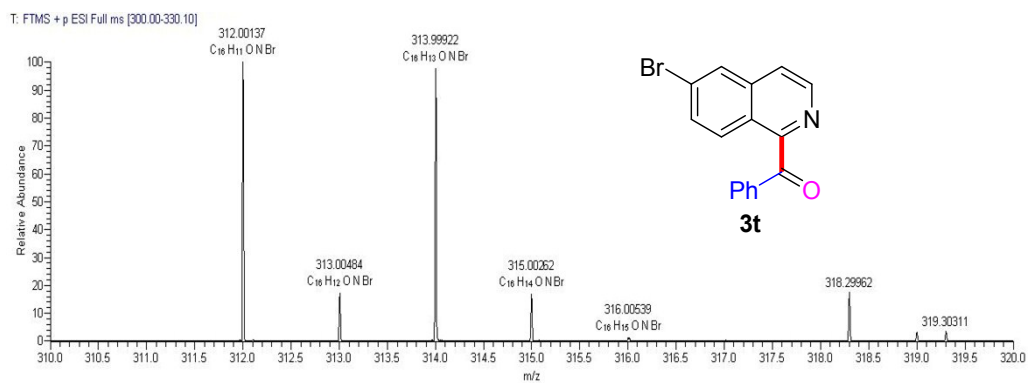



T: FTMS +p ESI Full ms [276.00-286.10]

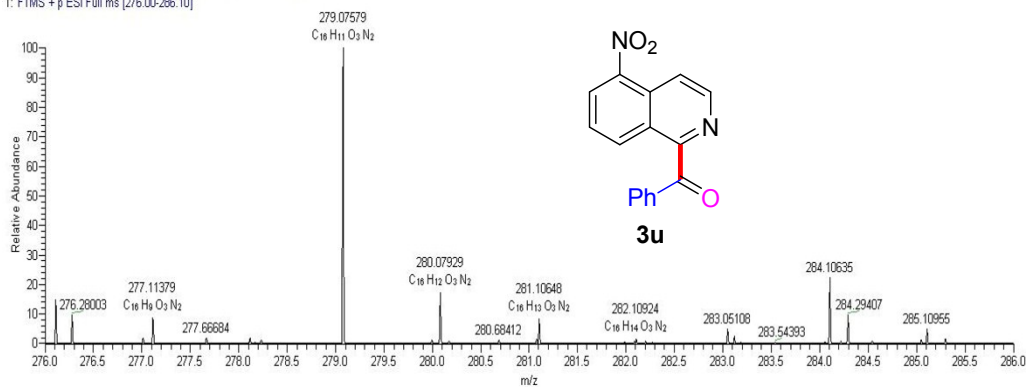

Supplement: c6cc03530b1.pdf [file c6cc03530b1.pdf]
